# Supplementary material
Source: PubMed Central journal article supplement (PMC3547537)
Supplement: NIHMS351387-supplement-supplemental_data.pdf [file NIHMS351387-supplement-supplemental_data.pdf]

## Supplementary Material

## Clustering Analysis

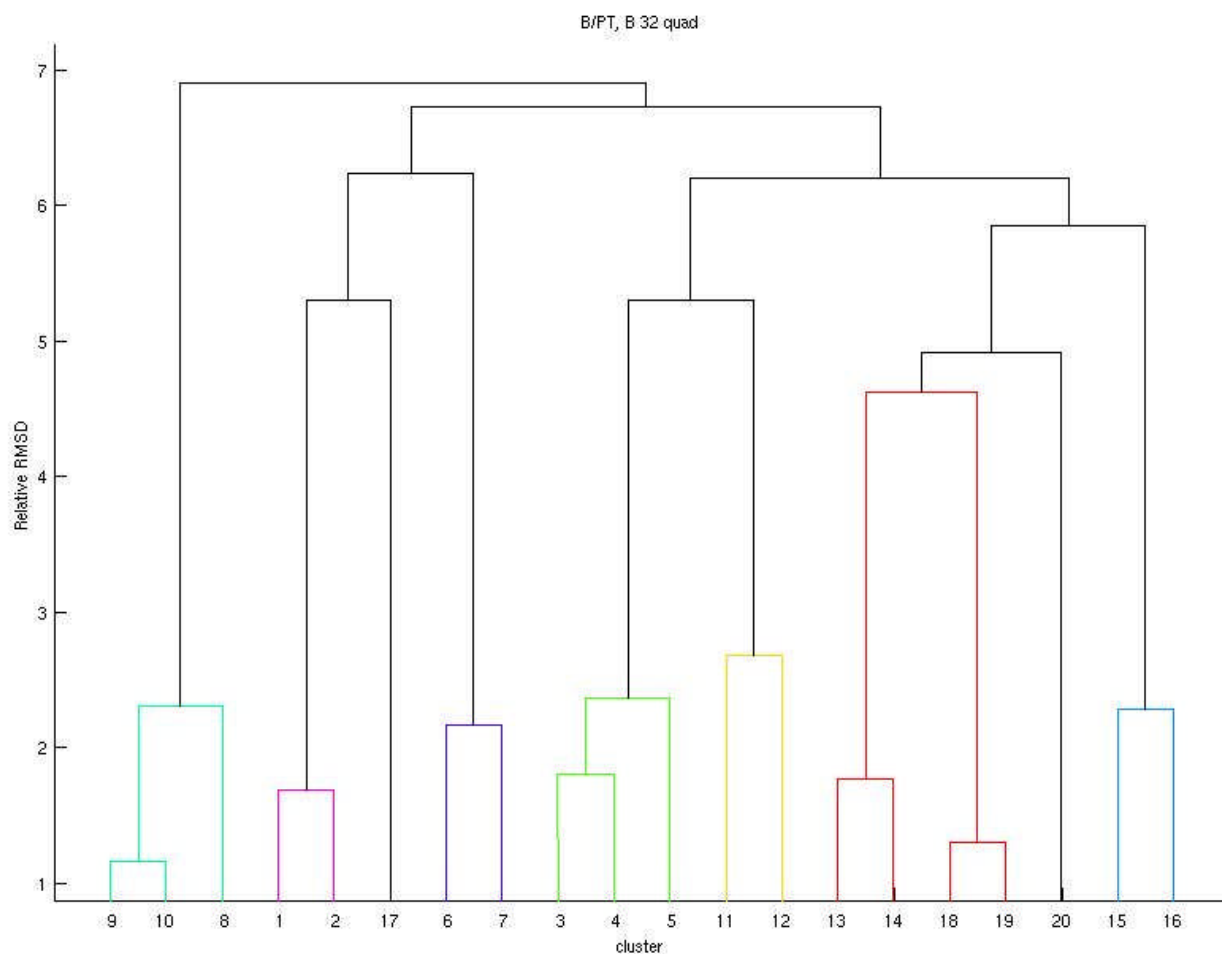

**conf(obj)** 60(1) 33(2) 126(3) 83(4) 115(5) 142(6) 160(7) 194(8) 201(9) 232(10) 272(11) 283(12)  
**weight** 6.69 10.79 2.89 13.58 6.47 9.21 7.17 13.89 3.10 5.35 12.58 8.29

**conf(obj)** 15(13) 47(14) 79(15) 102(16) 148(17) 180(18) 192(19) 218(20)  
**weight** 14.66 12.38 12.16 4.32 23.37 8.06 7.56 17.47

**Figure S1. Clustering Analysis: Dendrogram.** Platinum cross-linked system (B/PT) is represented by objects from 1 to 12, corresponding in the order to the conformations 60, 33, 126, 83, 115, 142, 160, 194, 201, 232, 272, and 283. Mismatched system (B\_32\_quad) is represented by objects from 13 to 20, corresponding in order to the frames 15, 47, 79, 102, 148, 180, 192, and 218. “weight” represents the weight of the representative conformations in the overall trajectory. The two systems are clustered independently, with one exception, object 17, which weights for 23.37 % of the mismatched conformations. At the second level of hierarchy the exception is associated with conformations 33 and 60, the only two conformations from the platinated system indicated as “repair conformations”. Considering the binding affinity, their structural similarities seem to be beyond the binding mode.

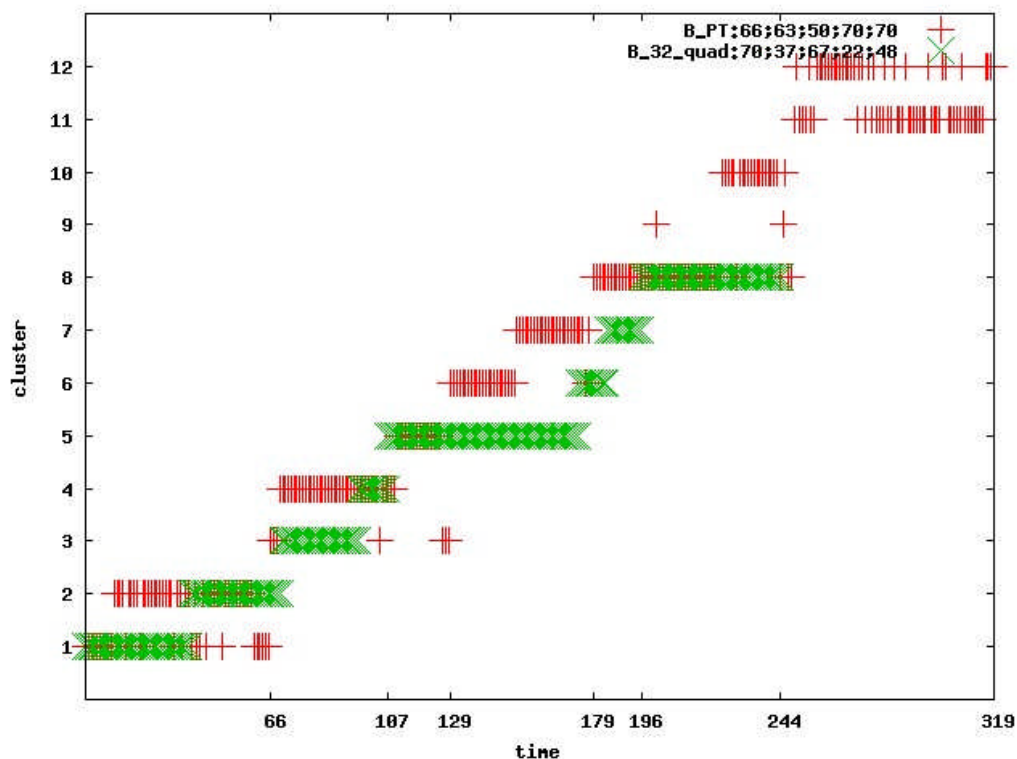

**Figure S2. Clustering Analysis: Representative Conformations.** Representative conformations for platinum cross-linked MutS $\alpha$ -DNA complex, B\_PT, 66, 63, 50, 70 and 70 corresponding to the five independent trials are clustered in 12 clusters, while the representative conformations from the mismatched complex, B\_32\_quad, 70, 37, 67, 22 and 48, are clustered in eight clusters.

### Mapping the DNA Binding Sites

**Table S1. The binding mode for the platinum cross-linked MutS $\alpha$ -DNA complex**

#### Frame 142. Interactions with MSH6

|   | DNA | type    | donor  | acceptor | distance, Å |
|---|-----|---------|--------|----------|-------------|
|   | ADE |         |        |          |             |
|   |     | None    |        |          |             |
|   | CYT |         |        |          |             |
| 1 |     | C-H...O | THR46  | CYT11    | 2.920       |
| 2 |     | O-H...O | THR46  | CYT11    | 2.515       |
| 3 |     | O-H...O | THR46  | CYT11    | 1.931       |
| 4 |     | N-H...O | GLY48  | CYT11    | 1.898       |
| 5 |     | C-H...O | GLY48  | CYT11    | 2.651       |
| 6 |     | N-H...O | MET 49 | CYT11    | 1.957       |
| 7 |     | C-H...O | LYS 70 | CYT7     | 2.519       |

|    |     |          |         |        |       |
|----|-----|----------|---------|--------|-------|
| 8  |     | C-H...O  | LYS 70  | CYT7   | 2.333 |
| 9  |     | C-H...O  | LYS 92  | CYT7   | 2.654 |
| 10 |     | C-H...O  | LYS 92  | CYT6   | 2.558 |
| 11 |     | N-H...O  | LYS 92  | CYT7   | 1.732 |
| 12 |     | C-H...O  | TYR 108 | CYT10  | 2.875 |
| 13 |     | C-H...O  | CYT11   | THR46  | 2.640 |
| 14 |     | C-H...S  | CYT7    | MET91  | 2.755 |
|    | GUA |          |         |        |       |
| 1  |     | C-H...O  | GLY69   | GUA8   | 2.876 |
| 2  |     | C-H...O  | GLY69   | GUA8   | 2.917 |
| 3  |     | N-H...O  | LYS70   | GUA8   | 2.534 |
| 4  |     | N-H...N  | LYS70   | GUA8   | 2.915 |
| 5  |     | C-H...O  | LYS70   | GUA8   | 2.490 |
| 6  |     | C-H...N  | PHE71   | GUA8   | 2.463 |
| 7  |     | C-H...N  | PHE71   | GUA9   | 2.893 |
| 8  |     | C-H...O  | LEU88   | GUA9   | 2.881 |
| 9  |     | C-H...O  | PRO101  | GUA9   | 2.528 |
| 10 |     | C-H...N  | PRO101  | GUA 9  | 2.843 |
| 11 |     | C-H...O  | VAL147  | GUA 10 | 2.591 |
| 12 |     | C-H...O  | VAL147  | GUA10  | 2.621 |
| 13 |     | C-H...O  | VAL147  | GUA10  | 2.846 |
| 14 |     | N-H...O  | VAL148  | GUA10  | 1.984 |
| 15 |     | O-H...O  | TYR484  | GUA 9  | 1.821 |
| 16 |     | C-H...O  | ARG613  | GUA8   | 2.965 |
| 17 |     | C-H...O  | ARG 613 | GUA8   | 2.475 |
| 18 |     | N-H...O  | GUA8    | VAL68  | 2.018 |
| 19 |     | C-H...N  | GUA8    | ARG613 | 2.842 |
| 20 |     | C-H...N  | GUA8    | ARG613 | 2.457 |
| 21 |     | C-H...N  | GUA10   | ARG150 | 2.675 |
| 22 |     | N-H...O  | GUA10   | GLU73  | 2.941 |
| 23 |     | N-H...O  | GUA10   | GLU73  | 1.784 |
| 24 |     | C-H...O  | GUA9    | GLY99  | 2.792 |
|    | THY |          |         |        |       |
| 1  |     | C-H...O  | MET91   | THY8   | 2.919 |
| 2  |     | C-H...O  | MET91   | THY8   | 2.679 |
| 3  |     | C-H...O  | TRP609  | THY13  | 2.435 |
| 4  |     | C-H...N  | THY3    | ARG146 | 2.948 |
| 5  |     | C-H...N  | THY3    | ARG146 | 2.885 |
| 6  |     | C-H...O  | THY8    | VAL89  | 2.955 |
| 7  |     | N-H...O  | THY8    | GLU73  | 2.126 |
| 8  |     | C-H...O  | THY 8   | GLY99  | 2.995 |
| 9  |     | C-H...pi | THY8    | PHE71  | 4.012 |

### Frame 33

#### A. Interactions with MSH6

|  |     | type | donor | acceptor | distance, Å |
|--|-----|------|-------|----------|-------------|
|  | ADE |      |       |          |             |
|  |     | None |       |          |             |
|  | CTY |      |       |          |             |

|    |     |          |         |        |       |
|----|-----|----------|---------|--------|-------|
| 1  |     | C-H...O  | THR46   | CYT 11 | 2.264 |
| 2  |     | C-H...O  | PRO47   | CYT 11 | 2.630 |
| 3  |     | C-H...O  | LYS639  | CYT15  | 2.803 |
| 4  |     | N-H...O  | LYS639  | CYT15  | 1.656 |
|    | GUA |          |         |        |       |
| 1  |     | C-H...N  | PHE71   | GUA9   | 2.694 |
| 2  |     | C-H...N  | PHE71   | GUA9   | 2.689 |
| 3  |     | C-H...O  | PRO101  | GUA9   | 2.587 |
| 4  |     | C-H...O  | PRO101  | GUA9   | 2.894 |
| 5  |     | C-H...O  | VAL147  | GUA10  | 2.514 |
| 6  |     | N-H...O  | VAL148  | GUA10  | 2.326 |
| 7  |     | C-H...O  | TYR484  | GUA9   | 2.520 |
| 8  |     | O-H...O  | TYR484  | GUA 9  | 1.773 |
| 9  |     | C-H...O  | ARG 613 | GUA 8  | 2.722 |
| 10 |     | C-H...N  | GUA10   | ARG146 | 2.796 |
|    | THY |          |         |        |       |
| 1  |     | C-H...O  | MET91   | THY8   | 2.928 |
| 2  |     | C-H...pi | THY8    | PHE71  | 3.956 |

### Frame 33

#### B. Interactions with MSH2

|   |     | type    | donor  | acceptor | distance, Å |
|---|-----|---------|--------|----------|-------------|
|   | ADE |         |        |          |             |
| 1 |     | N-H...O | LYS512 | ADE4     | 2.895       |
|   | CYT |         |        |          |             |
| 1 |     | N-H...O | LYS546 | CYT2     | 1.694       |
|   | GUA |         |        |          |             |
| 1 |     | N-H...O | LYS512 | GUA5     | 1.686       |
| 2 |     | C-H...O | GLN545 | GUA6     | 2.624       |

### Frame 115

#### A. Interactions with MSH6

|   |     | type    | donor | acceptor | distance, Å |
|---|-----|---------|-------|----------|-------------|
|   | ADE |         |       |          |             |
|   |     | None    |       |          |             |
|   | CYT |         |       |          |             |
| 1 |     | C-H...O | PRO47 | CYT 11   | 2.715       |
| 2 |     | C-H...O | PRO47 | CYT11    | 2.595       |
| 3 |     | C-H...O | PRO47 | CYT11    | 2.977       |
| 4 |     | C-H...O | LYS70 | CYT7     | 2.569       |

|    |     |         |        |        |       |
|----|-----|---------|--------|--------|-------|
| 5  |     | C-H...O | MET91  | CYT7   | 2.885 |
| 6  |     | C-H...O | MET91  | CYT7   | 2.453 |
| 7  |     | N-H...O | LYS92  | CYT7   | 2.451 |
| 8  |     | C-H...O | LYS92  | CYT 7  | 2.969 |
| 9  |     | C-H...O | PRO101 | CYT 10 | 2.849 |
| 10 |     | C-H...O | CYT7   | LYS92  | 2.567 |
| 11 |     | C-H...N | CYT7   | LYS92  | 2.849 |
| 12 |     | C-H...O | CYT 7  | LYS92  | 2.295 |
|    | GUA |         |        |        |       |
| 1  |     | C-H...N | GLY69  | GUA8   | 2.883 |
| 2  |     | N-H...O | LYS70  | GUA8   | 2.991 |
| 3  |     | C-H...O | LYS70  | GUA8   | 2.504 |
| 4  |     | C-H...N | MET91  | GUA10  | 2.985 |
| 5  |     | C-H...O | PRO101 | GUA9   | 2.448 |
| 6  |     | C-H...N | PRO101 | GUA9   | 2.889 |
| 7  |     | C-H...N | PRO101 | GUA9   | 2.766 |
| 8  |     | O-H...O | TYR108 | GUA9   | 2.360 |
| 9  |     | C-H...O | TYR108 | GUA9   | 2.991 |
| 10 |     | C-H...O | PRO128 | GUA9   | 2.822 |
| 11 |     | C-H...O | PRO128 | GUA9   | 2.366 |
| 12 |     | C-H...O | VAL147 | GUA10  | 2.607 |
| 13 |     | N-H...O | VAL148 | GUA10  | 1.795 |
| 14 |     | C-H...O | VAL148 | GUA10  | 2.908 |
| 15 |     | O-H...O | TYR484 | GUA8   | 2.721 |
| 16 |     | O-H...O | TYR484 | GUA9   | 1.751 |
| 17 |     | C-H...O | ILE611 | GUA12  | 2.734 |
| 18 |     | C-H...O | ILE611 | GUA12  | 2.601 |
| 19 |     | N-H...O | GUA8   | VAL68  | 1.827 |
| 20 |     | C-H...N | GUA9   | GLY69  | 2.945 |
| 21 |     | C-H...O | GUA9   | GLN124 | 2.951 |
| 22 |     | C-H...O | GUA9   | TYR108 | 2.751 |
|    | THY |         |        |        |       |
| 1  |     | C-H...O | MET91  | THY8   | 2.959 |
| 2  |     | C-H...O | LYS92  | THY8   | 2.891 |
| 3  |     | C-H...O | LYS92  | THY8   | 2.765 |
| 4  |     | N-H...O | LYS92  | THY8   | 2.669 |
| 5  |     | N-H...O | LYS92  | THY8   | 2.295 |
| 6  |     | C-H...O | ILE611 | THY13  | 2.727 |
| 7  |     | C-H...O | THY8   | PHE90  | 2.787 |
| 8  |     | N-H...O | THY8   | GLU73  | 1.696 |

## B. Interactions with MSH2

|   |     | type    | donor  | acceptor | distance, Å |
|---|-----|---------|--------|----------|-------------|
|   | ADE |         |        |          |             |
| 1 |     | N-H...O | LYS512 | ADE4     | 2.617       |
| 2 |     | C-H...O | THR526 | ADE4     | 2.777       |

|   |     |         |        |       |       |
|---|-----|---------|--------|-------|-------|
| 3 |     | O-H...O | THR526 | ADE4  | 2.470 |
| 4 |     | C-H...O | LYS528 | ADE4  | 2.468 |
|   | CYT |         |        |       |       |
| 1 |     | N-H...O | LYS550 | CYT5  | 1.092 |
|   | GUA |         |        |       |       |
| 1 |     | N-H...O | LYS6   | GUA11 | 1.584 |
| 2 |     | N-H...O | LYS512 | GUA5  | 1.582 |
| 3 |     | C-H...O | ARG524 | GUA5  | 2.986 |
| 4 |     | C-H...O | GLN545 | GUA6  | 2.533 |
| 5 |     | N-H...O | LYS546 | GUA6  | 1.971 |
| 6 |     | C-H...O | LYS546 | GUA6  | 2.852 |
| 7 |     | N-H...O | ASN547 | GUA6  | 1.779 |
| 8 |     | C-H...O | ASN547 | GUA6  | 2.847 |
| 9 |     | C-H...O | ASN547 | GUA6  | 2.801 |
|   | THY |         |        |       |       |
| 1 |     | N-H...O | LYS509 | THY3  | 2.373 |
| 2 |     | N-H...O | LYS528 | THY3  | 1.594 |

## Frame 126

### A. Interactions with MSH6

|   |     | type    | donor  | acceptor | distance, Å |
|---|-----|---------|--------|----------|-------------|
|   | ADE |         |        |          |             |
|   |     | None    |        |          |             |
|   | CYT |         |        |          |             |
| 1 |     | C-H...O | PRO47  | CYT11    | 2.688       |
| 2 |     | C-H...O | PRO47  | CYT11    | 2.709       |
| 3 |     | C-H...O | PRO47  | CYT11    | 2.968       |
| 4 |     | C-H...O | LYS70  | CYT7     | 2.709       |
| 5 |     | N-H...O | LYS70  | CYT7     | 2.412       |
| 6 |     | N-H...O | LYS92  | CYT7     | 2.692       |
| 7 |     | O-H...O | TYR108 | CYT10    | 2.111       |
| 8 |     | C-H...O | LYS639 | CYT15    | 2.741       |
| 9 |     | C-H...N | CYT7   | LYS92    | 2.849       |
|   | GUA |         |        |          |             |
| 1 |     | N-H...O | LYS70  | GUA8     | 2.747       |
| 2 |     | N-H...N | LYS70  | GUA8     | 2.887       |
| 3 |     | C-H...O | LYS70  | GUA8     | 2.701       |
| 4 |     | N-H...O | LYS70  | GUA8     | 1.779       |
| 5 |     | C-H...N | PHE71  | GUA8     | 2.951       |
| 6 |     | C-H...N | PHE71  | GUA8     | 2.685       |
| 7 |     | C-H...O | LEU88  | GUA9     | 2.659       |
| 8 |     | N-H...O | VAL89  | GUA9     | 2.907       |

|    |     |         |        |         |       |
|----|-----|---------|--------|---------|-------|
| 9  |     | C-H...O | PRO101 | GUA9    | 2.501 |
| 10 |     | C-H...N | PRO101 | GUA9    | 2.884 |
| 11 |     | O-H...O | TYR108 | GUA9    | 2.105 |
| 12 |     | C-H...O | TYR108 | GUA9    | 2.914 |
| 13 |     | C-H...O | PRO128 | GUA9    | 2.918 |
| 14 |     | C-H...O | PRO128 | GUA9    | 2.969 |
| 15 |     | N-H...O | VAL148 | GUA10   | 1.991 |
| 16 |     | C-H...O | TYR484 | GUA9    | 2.992 |
| 17 |     | O-H...O | TYR484 | GUA8    | 2.703 |
| 18 |     | O-H...O | TYR484 | GUA9    | 1.818 |
| 19 |     | N-H...O | GUA8   | VAL68   | 1.853 |
| 20 |     | N-H...O | GUA10  | GLU73   | 2.884 |
| 21 |     | N-H...O | GUA10  | GLU73   | 2.131 |
| 22 |     | N-H...O | GUA10  | GLU73   | 2.597 |
| 23 |     | C-H...O | GUA9   | GLY99   | 2.553 |
| 24 |     | C-H...O | GUA9   | TYR 108 | 2.904 |
|    | THY |         |        |         |       |
| 1  |     | C-H...O | MET91  | THY8    | 2.761 |
| 2  |     | C-H...O | MET91  | THY8    | 2.849 |
| 3  |     | C-H...O | MET91  | THY8    | 2.892 |
| 4  |     | C-H...O | SER98  | THY8    | 2.512 |
| 5  |     | C-H...O | LYS143 | THY12   | 2.888 |
| 6  |     | N-H...O | LYS143 | THY12   | 1.700 |
| 7  |     | N-H...O | TRP609 | THY14   | 2.749 |
| 8  |     | N-H...O | LYS643 | THY14   | 1.989 |
| 9  |     | C-H...O | THY8   | PHE90   | 2.897 |
| 10 |     | C-H...O | THY8   | VAL89   | 2.478 |
| 11 |     | N-H...O | THY8   | GLU73   | 1.694 |
| 12 |     | C-H...N | THY8   | GLY99   | 2.985 |
| 13 |     | C-H...O | THY 8  | GLY99   | 2.723 |

### B. Interactions with MSH2

|   |     | type    | donor  | acceptor | distance, Å |
|---|-----|---------|--------|----------|-------------|
|   | ADE |         |        |          |             |
| 1 |     | N-H...O | LYS512 | ADE4     | 2.650       |
| 2 |     | C-H...O | LYS528 | ADE4     | 2.708       |
|   | CYT |         |        |          |             |
| 1 |     | C-H...O | GLN545 | CYT5     | 2.615       |
|   |     | C-H...N | CYT 5  | GLN545   | 2.851       |
|   | GUA |         |        |          |             |
| 1 |     | N-H...O | LYS509 | GUA14    | 2.945       |
| 2 |     | N-H...N | LYS509 | GUA14    | 2.003       |
| 3 |     | N-H...N | LYS509 | GUA14    | 2.997       |
| 4 |     | N-H...O | LYS512 | GUA5     | 1.707       |
|   |     | C-H...O | ARG524 | GUA5     | 2.796       |

|   |     |         |        |      |       |
|---|-----|---------|--------|------|-------|
| 5 |     | C-H...O | LYS546 | GUA6 | 2.459 |
| 6 |     | N-H...O | ASN547 | GUA6 | 2.187 |
| 7 |     | C-H...O | ASN547 | GUA6 | 2.982 |
|   | THY |         |        |      |       |
|   |     | None    |        |      |       |

## Frame 201

### A. Interactions with MSH6

|    |     | type    | donor  | acceptor | distance, Å |
|----|-----|---------|--------|----------|-------------|
|    | ADE |         |        |          |             |
|    |     | None    |        |          |             |
|    | CYT |         |        |          |             |
| 1  |     | C-H...O | PRO47  | CYT11    | 2.970       |
| 2  |     | C-H...O | PRO47  | CYT11    | 2.824       |
| 3  |     | C-H...O | PRO47  | CYT11    | 2.908       |
| 4  |     | N-H...O | GLY48  | CYT11    | 2.967       |
| 5  |     | C-H...O | LYS70  | CYT7     | 2.577       |
| 6  |     | N-H...O | LYS70  | CYT7     | 2.065       |
| 7  |     | C-H...O | MET91  | CYT7     | 2.385       |
| 8  |     | N-H...O | LYS92  | CYT7     | 2.648       |
| 9  |     | N-H...N | LYS92  | CYT7     | 2.001       |
| 10 |     | C-H...N | LYS92  | CYT7     | 2.723       |
| 11 |     | N-H...O | ARG136 | CYT2     | 2.193       |
| 12 |     | N-H...O | ILE141 | CYT1     | 2.472       |
| 13 |     | C-H...O | ARG146 | CYT2     | 2.500       |
| 14 |     | N-H...O | LYS636 | CYT5     | 2.589       |
| 15 |     | C-H...O | LYS639 | CYT15    | 2.626       |
| 16 |     | N-H...O | LYS639 | CYT15    | 1.622       |
| 17 |     | C-H...O | CYT1   | CYS135   | 2.890       |
| 18 |     | C-H...N | CYT1   | HIS140   | 2.558       |
|    | GUA |         |        |          |             |
| 1  |     | C-H...N | VAL68  | GUA10    | 2.921       |
| 2  |     | C-H...O | GLY69  | GUA8     | 2.856       |
| 3  |     | C-H...N | PHE71  | GUA9     | 2.809       |
| 4  |     | C-H...N | PHE71  | GUA9     | 2.747       |
| 5  |     | C-H...N | PHE71  | GUA8     | 2.820       |
| 6  |     | C-H...O | PRO101 | GUA9     | 2.772       |
| 7  |     | C-H...O | PRO101 | GUA9     | 2.907       |
| 8  |     | C-H...O | PRO128 | GUA9     | 2.951       |
| 9  |     | C-H...O | VAL147 | GUA10    | 2.610       |
| 10 |     | N-H...O | VAL148 | GUA10    | 2.572       |
| 11 |     | C-H...O | LYS636 | GUA6     | 2.501       |



|    |     |         |        |        |       |
|----|-----|---------|--------|--------|-------|
| 12 |     | N-H...O | LYS636 | GUA6   | 2.053 |
| 13 |     | C-H...N | GUA8   | LYS70  | 2.918 |
| 14 |     | N-H...O | GUA10  | GLU73  | 2.180 |
| 15 |     | N-H...O | GUA10  | GLU73  | 2.910 |
| 16 |     | C-H...O | GUA9   | GLY99  | 2.566 |
|    | THY |         |        |        |       |
| 1  |     | C-H...O | SER98  | THY8   | 2.345 |
| 2  |     | N-H...O | GLY99  | THY8   | 2.754 |
| 3  |     | N-H...O | TRP609 | THY13  | 1.732 |
| 4  |     | C-H...O | ILE611 | THY13  | 2.495 |
| 5  |     | C-H...N | THY3   | ARG146 | 2.950 |
| 6  |     | C-H...S | THY8   | MET91  | 2.968 |
| 7  |     | N-H...O | THY8   | GLU73  | 1.952 |
| 8  |     | C-H...O | THY8   | GLY99  | 2.566 |

## B. Interactions with MSH2

|    |     | type    | donor  | acceptor | distance, Å |
|----|-----|---------|--------|----------|-------------|
|    | ADE |         |        |          |             |
| 1  |     | N-H...O | LYS512 | ADE4     | 2.874       |
| 2  |     | O-H...O | THR526 | ADE4     | 1.823       |
| 3  |     | C-H...O | LYS528 | ADE4     | 2.995       |
| 4  |     | C-H...O | LYS528 | ADE4     | 2.550       |
| 5  |     | C-H...O | LYS528 | ADE4     | 2.538       |
|    | CYT |         |        |          |             |
| 1  |     | C-H...O | LYS546 | CYT7     | 2.959       |
| 2  |     | N-H...O | LYS546 | CYT7     | 1.704       |
| 3  |     | C-H...N | CYT5   | GLN545   | 2.858       |
|    | GUA |         |        |          |             |
| 1  |     | C-H...O | LYS6   | GUA11    | 2.733       |
| 2  |     | N-H...O | LYS6   | GUA11    | 1.747       |
| 3  |     | C-H...O | LYS512 | GUA5     | 2.918       |
| 4  |     | N-H...O | LYS512 | GUA5     | 1.595       |
| 5  |     | C-H...O | ARG524 | GUA5     | 2.914       |
| 6  |     | C-H...O | GLN545 | GUA6     | 2.781       |
| 7  |     | C-H...O | GLN545 | GUA6     | 2.739       |
| 8  |     | N-H...O | LYS546 | GUA6     | 1.636       |
| 9  |     | C-H...O | LYS546 | GUA6     | 2.603       |
| 10 |     | C-H...O | LYS546 | GUA6     | 2.824       |
| 11 |     | C-H...O | LYS546 | GUA6     | 2.883       |
| 12 |     | N-H...O | LYS546 | GUA6     | 2.976       |
|    | THY |         |        |          |             |
| 1  |     | N-H...O | LYS509 | THY3     | 2.573       |
| 2  |     | N-H...O | LYS509 | THY3     | 2.328       |
| 3  |     | N-H...O | LYS528 | THY3     | 1.597       |

## Frame 232

## A. Interactions with MSH6

|    |     | type    | donor  | acceptor | distance, Å |
|----|-----|---------|--------|----------|-------------|
|    | ADE |         |        |          |             |
|    |     | None    |        |          |             |
|    | CYT |         |        |          |             |
| 1  |     | C-H...O | PRO47  | CYT11    | 2.456       |
| 2  |     | C-H...O | LYS70  | CYT7     | 2.569       |
| 3  |     | C-H...O | LYS70  | CYT7     | 2.652       |
| 4  |     | C-H...O | MET91  | CYT7     | 2.500       |
| 5  |     | C-H...O | MET91  | CYT7     | 2.733       |
| 6  |     | C-H...N | MET91  | CYT7     | 2.860       |
| 7  |     | N-H...O | LYS92  | CYT7     | 2.100       |
| 8  |     | N-H...N | LYS92  | CYT7     | 2.358       |
| 9  |     | C-H...N | LYS92  | CYT7     | 2.887       |
| 10 |     | C-H...O | LYS92  | CYT7     | 2.603       |
| 11 |     | C-H...O | LYS92  | CYT7     | 2.962       |
| 12 |     | N-H...O | LYS92  | CYT7     | 2.416       |
| 13 |     | N-H...O | LYS92  | CYT7     | 2.582       |
| 14 |     | N-H...O | LYS92  | CYT7     | 1.713       |
| 15 |     | N-H...O | LYS92  | CYT7     | 2.505       |
| 16 |     | C-H...O | PRO101 | CYT10    | 2.863       |
| 17 |     | C-H...O | TYR108 | CYT10    | 2.682       |
| 18 |     | C-H...O | CYS135 | CYT2     | 2.645       |
| 19 |     | N-H...O | ARG136 | CYT2     | 1.714       |
| 20 |     | C-H...O | HIS140 | CYT1     | 2.560       |
| 21 |     | N-H...O | ILE141 | CYT1     | 2.462       |
| 22 |     | C-H...O | ILE141 | CYT1     | 2.641       |
| 23 |     | C-H...O | ARG146 | CYT2     | 2.821       |
| 24 |     | N-H...O | LYS636 | CYT5     | 2.646       |
| 25 |     | N-H...O | LYS636 | CYT5     | 2.962       |
| 26 |     | C-H...O | LYS639 | CYT15    | 2.935       |
| 27 |     | C-H...O | LYS639 | CYT15    | 2.912       |
| 28 |     | C-H...O | LYS639 | CYT15    | 2.190       |
| 29 |     | C-H...O | CYT1   | ALA139   | 2.622       |
| 30 |     | C-H...N | CYT2   | ARG146   | 2.904       |
| 31 |     | N-H...O | CYT7   | LYS92    | 2.302       |
|    | GUA |         |        |          |             |
| 1  |     | C-H...O | GLY69  | GUA8     | 2.534       |
| 2  |     | C-H...O | GLY69  | GUA9     | 2.725       |
| 3  |     | C-H...O | LYS70  | GUA8     | 2.995       |
| 4  |     | C-H...N | PHE71  | GUA9     | 2.601       |
| 5  |     | C-H...O | LEU88  | GUA9     | 2.553       |
| 6  |     | C-H...O | PRO101 | GUA9     | 2.797       |
| 7  |     | C-H...O | VAL147 | GUA10    | 2.714       |

|    |     |         |        |        |       |
|----|-----|---------|--------|--------|-------|
| 8  |     | N-H...O | VAL148 | GUA10  | 2.100 |
| 9  |     | C-H...O | LYS636 | GUA6   | 2.823 |
| 10 |     | N-H...O | LYS636 | GUA6   | 1.680 |
| 11 |     | C-H...N | GUA9   | GLY69  | 2.690 |
| 12 |     | C-H...N | GUA10  | ARG150 | 2.874 |
| 13 |     | N-H...O | GUA10  | GLU73  | 2.239 |
| 14 |     | N-H...O | GUA10  | GLU73  | 2.509 |
| 15 |     | C-H...O | GUA9   | GLY99  | 2.568 |
|    | THY |         |        |        |       |
| 1  |     | C-H...O | MET91  | THY8   | 2.790 |
| 2  |     | C-H...O | SER98  | THY8   | 2.784 |
| 3  |     | N-H...O | TRP609 | THY13  | 2.381 |
| 4  |     | C-H...S | THY8   | MET91  | 2.769 |
| 5  |     | N-H...O | THY8   | GLU73  | 1.922 |
| 6  |     | C-H...O | THY8   | GLY99  | 2.552 |

## B. Interactions with MSH2

|    |     | type    | donor  | acceptor | distance, Å |
|----|-----|---------|--------|----------|-------------|
|    | ADE |         |        |          |             |
| 1  |     | C-H...O | LYS509 | ADE4     | 2.865       |
| 2  |     | N-H...N | LYS509 | ADE4     | 2.297       |
| 3  |     | N-H...O | LYS509 | ADE4     | 2.137       |
| 4  |     | N-H...N | LYS509 | ADE4     | 2.962       |
| 5  |     | N-H...N | LYS509 | ADE4     | 2.594       |
| 6  |     | O-H...O | THR526 | ADE4     | 1.851       |
| 7  |     | C-H...O | LYS528 | ADE4     | 2.307       |
| 8  |     | C-H...O | LYS528 | AD1E4    | 2.729       |
| 9  |     | C-H...N | ADE4   | LYS509   | 2.902       |
|    | CYT |         |        |          |             |
| 1  |     | C-H...O | LYS546 | CYT7     | 2.500       |
| 2  |     | N-H...O | LYS546 | CYT7     | 1.612       |
| 3  |     | C-H...N | CYT5   | GLN545   | 2.827       |
| 4  |     | C-H...N | CYT7   | LYS546   | 2.996       |
|    | GUA |         |        |          |             |
| 1  |     | C-H...O | LYS6   | GUA11    | 2.787       |
| 2  |     | N-H...O | LYS6   | GUA11    | 1.635       |
| 3  |     | C-H...O | LYS512 | GUA5     | 2.858       |
| 4  |     | C-H...O | ARG524 | GUA5     | 2.887       |
| 5  |     | C-H...O | ARG524 | GUA5     | 2.633       |
| 6  |     | C-H...O | GLN545 | GUA6     | 2.911       |
| 7  |     | C-H...O | GLN545 | GUA6     | 2.760       |
| 8  |     | N-H...O | LYS546 | GUA6     | 2.001       |
| 9  |     | C-H...O | LYS546 | GUA6     | 2.905       |
| 10 |     | N-H...O | LYS546 | GUA6     | 2.892       |
|    | THY |         |        |          |             |
| 1  |     | N-H...O | LYS528 | THY3     | 1.726       |

|   |  |         |        |        |       |
|---|--|---------|--------|--------|-------|
| 2 |  | N-H...O | LYS528 | THY3   | 2.962 |
| 3 |  | C-H...N | THY3   | LYS528 | 2.977 |

### Frame 272

#### A. Interactions with MSH6

|    |     | type    | donor  | acceptor | distance, Å |
|----|-----|---------|--------|----------|-------------|
|    | ADE |         |        |          |             |
|    |     | none    |        |          |             |
|    | CYT |         |        |          |             |
| 1  |     | C-H...O | THR46  | CYT11    | 2.860       |
| 2  |     | C-H...O | THR46  | CYT11    | 2.798       |
| 3  |     | O-H...O | THR46  | CYT11    | 1.542       |
| 4  |     | C-H...O | PRO47  | CYT11    | 2.583       |
| 5  |     | N-H...O | GLY48  | CYT11    | 2.788       |
| 6  |     | N-H...O | GLY48  | CYT11    | 1.914       |
| 7  |     | N-H...O | MET49  | CYT11    | 2.004       |
| 8  |     | C-H...N | PHE71  | CYT7     | 2.669       |
| 9  |     | C-H...N | PHE71  | CYT7     | 2.935       |
| 10 |     | C-H...O | MET91  | CYT7     | 2.797       |
| 11 |     | C-H...O | MET91  | CYT7     | 2.714       |
| 12 |     | C-H...O | TYR108 | CYT10    | 2.804       |
| 13 |     | C-H...O | CYT7   | LYS92    | 2.874       |
|    | GUA |         |        |          |             |
| 1  |     | C-H...O | GLY48  | GUA10    | 2.864       |
| 2  |     | C-H...O | GLY69  | GUA8     | 2.541       |
| 3  |     | N-H...N | LYS70  | GUA8     | 2.771       |
| 4  |     | C-H...O | LYS70  | GUA8     | 2.475       |
| 5  |     | C-H...N | PHE71  | GUA9     | 2.632       |
| 6  |     | C-H...N | PHE71  | GUA8     | 2.800       |
| 7  |     | C-H...O | LEU88  | GUA9     | 2.280       |
| 8  |     | N-H...O | VAL89  | GUA9     | 2.514       |
| 9  |     | C-H...O | PRO101 | GUA9     | 2.674       |
| 10 |     | N-H...O | GUA8   | GLU73    | 2.859       |
| 11 |     | N-H...O | GUA8   | GLU73    | 2.637       |
| 12 |     | N-H...O | GUA10  | GLU73    | 2.094       |
| 13 |     | N-H...O | GUA10  | GLU73    | 2.445       |
|    | THY |         |        |          |             |
| 1  |     | C-H...O | GLU73  | THY8     | 2.686       |
| 2  |     | N-H...O | VAL89  | THY8     | 2.870       |
| 3  |     | C-H...O | MET91  | THY8     | 2.956       |
| 4  |     | C-H...O | MET91  | THY8     | 2.561       |
| 5  |     | C-H...O | GLY99  | THY8     | 2.997       |
| 6  |     | N-H...O | TRP609 | THY13    | 2.182       |
| 7  |     | N-H...O | LYS643 | THY14    | 2.410       |
| 8  |     | C-H...O | THY8   | VAL89    | 2.298       |

|   |  |         |      |       |       |
|---|--|---------|------|-------|-------|
| 9 |  | N-H...O | THY8 | GLU73 | 2.213 |
|---|--|---------|------|-------|-------|

### B. Interactions with MSH2

|   |     | type    | donor  | acceptor | distance, Å |
|---|-----|---------|--------|----------|-------------|
|   | ADE |         |        |          |             |
| 1 |     | N-H...O | LYS512 | ADE4     | 2.368       |
| 2 |     | O-H...O | THR526 | ADE4     | 1.764       |
| 3 |     | C-H...O | LYS528 | ADE4     | 2.998       |
|   | CYT |         |        |          |             |
| 1 |     | C-H...O | LYS546 | CYT7     | 2.672       |
| 2 |     | N-H...O | LYS546 | CYT7     | 2.895       |
| 3 |     | N-H...O | LYS546 | CYT7     | 1.813       |
| 4 |     | C-H...N | CYT5   | GLN545   | 2.969       |
|   | GUA |         |        |          |             |
| 1 |     | N-H...O | LYS6   | GUA11    | 1.695       |
| 2 |     | C-H...O | LYS509 | GUA15    | 2.548       |
| 3 |     | C-H...O | LYS512 | GUA5     | 2.478       |
| 4 |     | N-H...O | LYS512 | GUA5     | 1.649       |
| 5 |     | C-H...O | GLN545 | GUA6     | 2.409       |
| 6 |     | N-H...O | LYS546 | GUA6     | 1.753       |
| 7 |     | N-H...O | LYS546 | GUA6     | 2.973       |
| 8 |     | C-H...O | LYS546 | GUA6     | 2.588       |
|   | THY |         |        |          |             |
| 1 |     | C-H...O | LYS528 | THY3     | 2.566       |
| 2 |     | C-H...O | LYS528 | THY3     | 2.709       |
| 3 |     | N-H...O | LYS528 | THY3     | 1.716       |

### Frame 160

#### A. MSH6 interactions

|   |     | type    | donor | acceptor | distance, Å |
|---|-----|---------|-------|----------|-------------|
|   | ADE |         |       |          |             |
|   |     | None    |       |          |             |
|   | CYT |         |       |          |             |
| 1 |     | C-H...O | THR46 | CYT11    | 2.850       |
| 2 |     | O-H...O | THR46 | CYT11    | 1.646       |
| 3 |     | C-H...O | PRO47 | CYT11    | 2.723       |
| 4 |     | C-H...O | PRO47 | CYT11    | 2.816       |
| 5 |     | N-H...O | GLY48 | CYT11    | 2.842       |
| 6 |     | N-H...O | GLY48 | CYT11    | 1.940       |
| 7 |     | C-H...O | GLY48 | CYT11    | 2.725       |
| 8 |     | N-H...O | MET49 | CYT11    | 2.381       |
| 9 |     | C-H...O | MET49 | CYT11    | 2.934       |

|    |     |         |        |        |       |
|----|-----|---------|--------|--------|-------|
| 10 |     | C-H...O | LYS70  | CYT7   | 2.369 |
| 11 |     | O-H...O | TYR108 | CYT10  | 2.135 |
| 12 |     | C-H...O | TYR108 | CYT10  | 2.861 |
| 13 |     | C-H...O | ARG604 | CYT15  | 2.600 |
| 14 |     | C-H...O | LYS639 | CYT15  | 2.643 |
|    | GUA |         |        |        |       |
| 1  |     | C-H...O | GLY48  | GUA10  | 2.576 |
| 2  |     | C-H...O | GLY69  | GUA8   | 2.614 |
| 3  |     | N-H...O | LYS70  | GUA8   | 2.931 |
| 4  |     | N-H...N | LYS70  | GUA8   | 2.440 |
| 5  |     | C-H...O | LYS70  | GUA8   | 2.717 |
| 6  |     | C-H...N | LYS70  | GUA8   | 2.770 |
| 7  |     | N-H...N | PHE71  | GUA8   | 2.977 |
| 8  |     | C-H...N | PHE71  | GUA8   | 2.537 |
| 9  |     | C-H...N | PHE71  | GUA9   | 2.888 |
| 10 |     | C-H...N | PHE71  | GUA9   | 2.860 |
| 11 |     | C-H...N | PHE71  | GUA9   | 2.771 |
| 12 |     | C-H...O | LEU88  | GUA9   | 2.997 |
| 13 |     | N-H...O | VAL89  | GUA9   | 2.888 |
| 14 |     | C-H...O | PRO101 | GUA9   | 2.645 |
| 15 |     | C-H...N | PRO101 | GUA9   | 2.585 |
| 16 |     | O-H...O | TYR108 | GUA9   | 2.706 |
| 17 |     | C-H...O | VAL147 | GUA10  | 2.721 |
| 18 |     | C-H...O | VAL147 | GUA10  | 2.834 |
| 19 |     | C-H...O | VAL147 | GUA10  | 2.889 |
| 20 |     | N-H...O | VAL148 | GUA10  | 2.034 |
| 21 |     | O-H...O | TYR484 | GUA9   | 1.686 |
| 22 |     | C-H...O | ARG613 | GUA8   | 2.903 |
| 23 |     | N-H...O | GUA8   | VAL68  | 1.901 |
| 24 |     | C-H...N | GUA8   | ARG613 | 2.689 |
| 25 |     | C-H...N | GUA8   | ARG613 | 2.899 |
| 26 |     | C-H...N | GUA9   | GLY69  | 2.926 |
| 27 |     | C-H...O | GUA9   | GLN124 | 2.651 |
| 28 |     | C-H...N | GUA10  | ARG150 | 2.762 |
| 29 |     | C-H...N | GUA10  | ARG150 | 2.836 |
| 30 |     | N-H...O | GUA10  | GLU73  | 1.982 |
|    | THY |         |        |        |       |
| 1  |     | C-H...N | THY3   | ARG146 | 2.999 |
| 2  |     | N-H...O | THY8   | GLU73  | 1.725 |
| 3  |     | C-H...O | THY8   | GLY99  | 2.866 |

### B. Interactions with MSH2

|   |     | type    | donor  | acceptor | distance, Å |
|---|-----|---------|--------|----------|-------------|
|   | ADE |         |        |          |             |
| 1 |     | N-H...O | LYS110 | ADE2     | 2.536       |

|   |     |         |        |       |       |
|---|-----|---------|--------|-------|-------|
| 2 |     | N-H...O | LYS110 | ADE2  | 2.340 |
| 3 |     | C-H...O | ASN547 | ADE4  | 2.939 |
| 4 |     | C-H...O | ASN547 | ADE4  | 2.599 |
|   | CYT |         |        |       |       |
| 1 |     | C-H...O | LYS6   | CYT10 | 2.609 |
| 2 |     | N-H...O | LYS546 | CYT7  | 1.900 |
|   | GUA |         |        |       |       |
| 1 |     | C-H...O | LYS6   | GUA11 | 2.842 |
| 2 |     | N-H...O | LYS6   | GUA11 | 1.726 |
| 3 |     | C-H...O | LYS509 | GUA15 | 2.921 |
| 4 |     | C-H...O | ASN547 | GUA5  | 2.295 |
|   | THY |         |        |       |       |
|   |     | None    |        |       |       |

### Frame 283

#### A. Interactions with MSH6

|    |     | type     | donor  | acceptor | distance, Å |
|----|-----|----------|--------|----------|-------------|
|    | ADE |          |        |          |             |
|    |     | None     |        |          |             |
|    | CYT |          |        |          |             |
| 1  |     | C-H...O  | THR46  | CYT11    | 2.692       |
| 2  |     | O-H...O  | THR46  | CYT11    | 1.595       |
| 3  |     | C-H...O  | PRO47  | CYT11    | 2.839       |
| 4  |     | N-H...O  | GLY48  | CYT11    | 1.738       |
| 5  |     | C-H...O  | GLY48  | CYT11    | 2.470       |
| 6  |     | C-H...O  | LYS70  | CYT7     | 2.802       |
| 7  |     | C-H...O  | MET91  | CYT7     | 2.837       |
| 8  |     | C-H...O  | GLY93  | CYT6     | 2.914       |
| 9  |     | C-H...N  | ASN94  | CYT6     | 2.891       |
| 10 |     | O-H...O  | TYR108 | CYT10    | 2.711       |
| 11 |     | C-H...O  | TYR108 | CYT10    | 2.899       |
| 12 |     | C-H...N  | CYT11  | ASN94    | 2.646       |
| 13 |     | C-H...pi | CYT11  | TR6 95   | 4.304       |
| 14 |     | C-H...pi | CYT11  | TR6 95   | 4.634       |
|    | GUA |          |        |          |             |
| 1  |     | C-H...O  | VAL68  | GUA10    | 2.572       |
| 2  |     | C-H...N  | PHE71  | GUA9     | 2.588       |
| 3  |     | C-H...N  | PHE71  | GUA9     | 2.734       |
| 4  |     | C-H...O  | LEU88  | GUA9     | 2.965       |
| 5  |     | C-H...O  | PRO101 | GUA9     | 2.577       |
| 6  |     | C-H...N  | PRO101 | GUA9     | 2.961       |
| 7  |     | C-H...N  | PRO101 | GUA9     | 2.889       |
| 8  |     | C-H...O  | ILE103 | GUA11    | 2.837       |

|    |     |         |        |       |       |
|----|-----|---------|--------|-------|-------|
| 9  |     | O-H...O | TYR108 | GUA9  | 2.221 |
| 10 |     | C-H...O | GUA8   | GLY69 | 2.583 |
| 11 |     | N-H...S | GUA10  | MET91 | 2.952 |
| 12 |     | N-H...O | GUA10  | GLU73 | 1.931 |
|    | THY |         |        |       |       |
| 1  |     | C-H...O | GLU73  | THY 8 | 2.946 |
| 2  |     | C-H...O | MET91  | THY 8 | 2.505 |
| 3  |     | C-H...O | MET91  | THY8  | 2.772 |
| 4  |     | C-H...O | MET91  | THY8  | 2.483 |
| 5  |     | C-H...O | TRP609 | THY13 | 2.889 |
| 6  |     | N-H...O | THY8   | GLU73 | 1.793 |

## B. Interactions with MSH2

|   |     | type    | donor  | acceptor | distance, Å |
|---|-----|---------|--------|----------|-------------|
|   | ADE |         |        |          |             |
| 1 |     | O-H...O | THR526 | ADE4     | 1.749       |
| 2 |     | C-H...O | LYS528 | ADE4     | 2.912       |
| 3 |     | C-H...O | LYS528 | ADE4     | 2.449       |
|   | CYT |         |        |          |             |
| 1 |     | C-H...O | LYS6   | CYT10    | 2.937       |
| 2 |     | N-H...O | LYS546 | CYT7     | 1.628       |
|   | GUA |         |        |          |             |
| 1 |     | C-H...O | LYS6   | GUA11    | 2.802       |
| 2 |     | N-H...O | LYS6   | GUA11    | 1.671       |
| 3 |     | C-H...O | LYS512 | GUA5     | 2.821       |
| 4 |     | N-H...O | LYS512 | GUA5     | 2.896       |
|   | THY |         |        |          |             |
| 1 |     | C-H...O | LYS528 | THY3     | 2.841       |
| 2 |     | N-H...O | LYS528 | THY3     | 1.859       |

## Frame 60

### A. Interactions with MSH6

|   |     | type    | donor | acceptor | distance, Å |
|---|-----|---------|-------|----------|-------------|
|   | ADE |         |       |          |             |
|   |     | None    |       |          |             |
|   | CYT |         |       |          |             |
| 1 |     | C-H...O | THR46 | CYT11    | 2.636       |
| 2 |     | C-H...O | PRO47 | CYT11    | 2.370       |
| 3 |     | C-H...O | PHE71 | CYT7     | 2.832       |
| 4 |     | C-H...O | LYS92 | CYT7     | 2.752       |



|    |     |          |        |        |       |
|----|-----|----------|--------|--------|-------|
| 5  |     | C-H...O  | LYS92  | CYT6   | 2.778 |
| 6  |     | C-H...O  | LYS92  | CYT7   | 2.540 |
| 7  |     | N-H...O  | LYS 92 | CYT6   | 2.603 |
| 8  |     | N-H...O  | LYS92  | CYT6   | 2.968 |
| 9  |     | C-H...O  | LYS636 | CYT5   | 2.641 |
| 10 |     | N-H...O  | LYS639 | CYT15  | 2.448 |
| 11 |     | N-H...O  | LYS639 | CYT15  | 2.814 |
| 12 |     | C-H...N  | CYT6   | LYS 92 | 2.963 |
|    | GUA |          |        |        |       |
| 1  |     | C-H...O  | GLY69  | GUA9   | 2.465 |
| 2  |     | N-H...O  | LYS70  | GUA8   | 2.943 |
| 3  |     | C-H...N  | PHE71  | GUA9   | 2.742 |
| 4  |     | C-H...N  | PHE71  | GUA9   | 2.794 |
| 5  |     | C-H...O  | PHE71  | GUA8   | 2.519 |
| 6  |     | C-H...O  | LEU88  | GUA9   | 2.659 |
| 7  |     | C-H...O  | PRO101 | GUA9   | 2.468 |
| 8  |     | C-H...N  | PRO101 | GUA9   | 2.674 |
| 9  |     | C-H...O  | VAL147 | GUA10  | 2.662 |
| 10 |     | N-H...O  | VAL148 | GUA10  | 2.195 |
| 11 |     | O-H...O  | TYR484 | GUA9   | 1.759 |
| 12 |     | C-H...pi | GUA8   | PHE71  | 4.968 |
|    | THY |          |        |        |       |
| 1  |     | C-H...O  | MET91  | THY8   | 2.846 |
| 2  |     | C-H...O  | GLY99  | THY8   | 2.516 |
| 3  |     | C-H...O  | LYS639 | THY14  | 2.732 |
| 4  |     | N-H...O  | LYS639 | THY14  | 1.865 |
| 5  |     | C-H...O  | THY8   | GLY99  | 2.813 |

## B. Interactions with MSH2

|   |     | type    | donor  | acceptor | distance, Å |
|---|-----|---------|--------|----------|-------------|
|   | ADE |         |        |          |             |
| 1 |     | N-H...O | LYS528 | ADE4     | 1.770       |
|   | CYT |         |        |          |             |
| 1 |     | C-H...O | LYS6   | CYT10    | 2.632       |
| 2 |     | N-H...O | LYS6   | CYT10    | 1.886       |
| 3 |     | C-H...O | GLN545 | CYT5     | 2.823       |
| 4 |     | C-H...O | LYS546 | CYT7     | 2.698       |
| 5 |     | C-H...O | LYS546 | CYT7     | 2.777       |
| 6 |     | C-H...O | LYS546 | CYT7     | 2.718       |
| 7 |     | C-H...N | CYT5   | GLN545   | 2.475       |
|   | GUA |         |        |          |             |
| 1 |     | C-H...O | GLN545 | GUA6     | 2.681       |
| 2 |     | C-H...O | GLN545 | GUA6     | 2.571       |
| 3 |     | N-H...O | LYS546 | GUA6     | 1.784       |
| 4 |     | C-H...N | GUA5   | ASN547   | 2.797       |
|   | THY |         |        |          |             |

|  |  |      |  |  |  |
|--|--|------|--|--|--|
|  |  | None |  |  |  |
|--|--|------|--|--|--|

### Frame 83

#### A. Interactions with MSH6

|    |     | type     | donor  | acceptor | distance, Å |
|----|-----|----------|--------|----------|-------------|
|    | ADE |          |        |          |             |
|    |     | None     |        |          |             |
|    | CYT |          |        |          |             |
| 1  |     | C-H...O  | PRO47  | CYT11    | 2.822       |
| 2  |     | C-H...O  | PRO47  | CYT11    | 2.717       |
| 3  |     | C-H...O  | PRO47  | CYT11    | 2.875       |
| 4  |     | C-H...O  | PRO101 | CYT10    | 2.687       |
| 5  |     | O-H...O  | TYR108 | CYT10    | 2.440       |
| 6  |     | C-H...O  | TYR108 | CYT10    | 2.402       |
| 7  |     | C-H...O  | LYS639 | CYT15    | 2.335       |
| 8  |     | N-H...O  | LYS639 | CYT15    | 1.673       |
|    | GUA |          |        |          |             |
| 1  |     | C-H...N  | GLY69  | GUA8     | 2.929       |
| 2  |     | C-H...O  | GLY69  | GUA8     | 2.940       |
| 3  |     | N-H...O  | LYS70  | GUA8     | 2.619       |
| 4  |     | N-H...N  | LYS70  | GUA8     | 2.465       |
| 5  |     | C-H...N  | PHE71  | GUA8     | 2.728       |
| 6  |     | C-H...N  | PHE71  | GUA8     | 2.776       |
| 7  |     | C-H...O  | LEU88  | GUA9     | 2.633       |
| 8  |     | N-H...O  | VAL89  | GUA9     | 2.226       |
| 9  |     | C-H...O  | PRO101 | GUA9     | 2.618       |
| 10 |     | C-H...N  | PRO101 | GUA9     | 2.741       |
| 11 |     | O-H...O  | TYR108 | GUA9     | 2.145       |
| 12 |     | C-H...O  | TYR108 | GUA9     | 2.821       |
| 13 |     | C-H...O  | PRO128 | GUA9     | 2.727       |
| 14 |     | C-H...O  | PRO128 | GUA9     | 2.942       |
| 15 |     | C-H...O  | VAL147 | GUA10    | 2.609       |
| 16 |     | C-H...O  | VAL147 | GUA10    | 2.804       |
| 17 |     | N-H...O  | VAL148 | GUA10    | 1.943       |
| 18 |     | O-H...O  | TYR484 | GUA8     | 2.823       |
| 19 |     | O-H...O  | TYR484 | GUA9     | 1.972       |
| 20 |     | N-H...O  | GUA8   | VAL68    | 1.841       |
| 21 |     | C-H...O  | GUA9   | GLN124   | 2.683       |
| 22 |     | N-H...O  | GUA10  | GLU73    | 2.974       |
| 23 |     | C-H...pi | GUA8   | TYR484   | 4.120       |
|    | THY |          |        |          |             |
| 1  |     | C-H...O  | PHE71  | THY8     | 2.978       |
| 2  |     | C-H...N  | PHE71  | THY8     | 2.917       |
| 3  |     | N-H...O  | VAL89  | THY8     | 2.708       |

|    |  |          |        |       |       |
|----|--|----------|--------|-------|-------|
| 4  |  | C-H...O  | MET91  | THY8  | 2.362 |
| 5  |  | C-H...O  | MET91  | THY8  | 2.998 |
| 6  |  | C-H...O  | SER98  | THY8  | 2.838 |
| 7  |  | N-H...O  | TRP609 | THY13 | 2.551 |
| 8  |  | N-H...O  | LYS643 | THY14 | 1.635 |
| 9  |  | C-H...O  | THY8   | PHE90 | 2.987 |
| 10 |  | C-H...O  | THY8   | VAL89 | 2.361 |
| 11 |  | C-H...pi | THY8   | PHE71 | 4.459 |

### B. Interactions with MSH2

|    |     | type    | donor  | acceptor | distance, Å |
|----|-----|---------|--------|----------|-------------|
|    | ADE |         |        |          |             |
| 1  |     | N-H...O | LYS512 | ADE4     | 2.485       |
|    | CYT |         |        |          |             |
| 1  |     | C-H...O | LYS6   | CYT10    | 2.579       |
|    | GUA |         |        |          |             |
| 1  |     | N-H...N | LYS509 | GUA14    | 2.098       |
| 2  |     | N-H...N | LYS509 | GUA14    | 2.997       |
| 3  |     | N-H...O | LYS512 | GUA5     | 1.785       |
| 4  |     | C-H...O | ARG524 | GUA5     | 2.525       |
| 5  |     | C-H...O | GLN545 | GUA6     | 2.538       |
| 6  |     | N-H...O | LYS546 | GUA6     | 1.795       |
| 7  |     | C-H...O | LYS546 | GUA6     | 2.823       |
| 8  |     | N-H...O | ASN547 | GUA6     | 2.019       |
| 9  |     | C-H...O | ASN547 | GUA6     | 2.534       |
| 10 |     | C-H...N | GUA14  | LYS509   | 2.772       |
| 11 |     | C-H...N | GUA5   | LYS512   | 2.756       |
|    | THY |         |        |          |             |
| 1  |     | N-H...O | LYS528 | THY3     | 1.739       |

### Frame 194

#### A. Interactions with MSH6

|  |     | type | donor | acceptor | distance, Å |
|--|-----|------|-------|----------|-------------|
|  | ADE |      |       |          |             |
|  |     | None |       |          |             |
|  | CYT |      |       |          |             |

|    |     |         |        |        |       |
|----|-----|---------|--------|--------|-------|
| 1  |     | C-H...O | THR46  | CYT11  | 2.749 |
| 2  |     | C-H...O | PRO47  | CYT11  | 2.866 |
| 3  |     | C-H...O | PRO47  | CYT11  | 2.821 |
| 4  |     | C-H...O | PRO47  | CYT11  | 2.433 |
| 5  |     | C-H...O | MET91  | CYT7   | 2.908 |
| 6  |     | C-H...N | MET91  | CYT7   | 2.714 |
| 7  |     | N-H...O | LYS92  | CYT7   | 1.852 |
| 8  |     | C-H...O | LYS92  | CYT7   | 2.795 |
| 9  |     | C-H...O | LYS92  | CYT7   | 2.939 |
| 10 |     | N-H...O | LYS92  | CYT7   | 2.490 |
| 11 |     | N-H...O | LYS92  | CYT7   | 1.781 |
| 12 |     | N-H...O | LYS92  | CYT7   | 1.793 |
| 13 |     | N-H...O | LYS92  | CYT7   | 2.422 |
| 14 |     | C-H...O | PRO101 | CYT10  | 2.924 |
| 15 |     | O-H...O | TYR108 | CYT10  | 1.783 |
| 16 |     | C-H...O | TYR108 | CYT10  | 2.525 |
| 17 |     | C-H...O | CYS135 | CYT2   | 2.473 |
| 18 |     | C-H...O | ARG136 | CYT2   | 2.983 |
| 19 |     | C-H...O | ARG136 | CYT2   | 2.959 |
| 20 |     | N-H...O | ARG136 | CYT2   | 1.584 |
| 21 |     | C-H...O | HIS140 | CYT 1  | 2.332 |
| 22 |     | N-H...O | ILE141 | CYT1   | 2.015 |
| 23 |     | C-H...O | ILE141 | CYT2   | 2.677 |
| 24 |     | C-H...O | ARG146 | CYT2   | 2.813 |
| 25 |     | C-H...O | ARG146 | CYT 2  | 2.547 |
| 26 |     | N-H...O | LYS636 | CYT5   | 2.794 |
| 27 |     | N-H...O | LYS639 | CYT15  | 1.759 |
| 28 |     | C-H...O | CYT1   | ALA139 | 2.533 |
| 29 |     | C-H...N | CYT2   | ARG136 | 2.805 |
|    | GUA |         |        |        |       |
| 1  |     | C-H...O | GLY69  | GUA8   | 2.949 |
| 2  |     | C-H...O | PHE71  | GUA9   | 2.866 |
| 3  |     | C-H...O | PHE71  | GUA9   | 2.873 |
| 4  |     | C-H...N | PHE71  | GUA9   | 2.865 |
| 5  |     | C-H...N | PHE71  | GUA9   | 2.566 |
| 6  |     | C-H...O | LEU88  | GUA9   | 2.468 |
| 7  |     | N-H...O | VAL89  | GUA9   | 2.188 |
| 8  |     | C-H...O | PRO101 | GUA9   | 2.725 |
| 9  |     | O-H...O | TYR108 | GUA9   | 2.384 |
| 10 |     | C-H...O | VAL147 | GUA10  | 2.941 |
| 11 |     | N-H...O | VAL148 | GUA10  | 2.308 |
| 12 |     | N-H...O | LYS636 | GUA6   | 1.655 |
| 13 |     | C-H...O | GUA9   | GLY99  | 2.743 |
|    | THY |         |        |        |       |
| 1  |     | C-H...N | GLU73  | THY8   | 2.833 |
| 2  |     | N-H...O | LYS143 | THY12  | 1.711 |
| 3  |     | N-H...O | THY8   | GLU73  | 1.776 |

**B. Interactions with MSH2**

|   |     | type    | donor  | acceptor | distance, Å |
|---|-----|---------|--------|----------|-------------|
|   | ADE |         |        |          |             |
| 1 |     | N-H...O | LYS528 | ADE4     | 1.535       |
|   | CYT |         |        |          |             |
| 1 |     | C-H...O | GLN518 | CYT4     | 2.844       |
| 2 |     | N-H...O | LYS546 | CYT7     | 1.984       |
| 3 |     | N-H...O | LYS550 | CYT5     | 2.175       |
|   | GUA |         |        |          |             |
| 1 |     | C-H...O | LYS6   | GUA11    | 2.916       |
| 2 |     | N-H...O | LYS6   | GUA11    | 1.688       |
| 3 |     | C-H...O | GLN545 | GUA6     | 2.579       |
| 4 |     | C-H...O | GLN545 | GUA6     | 2.296       |
| 5 |     | N-H...O | LYS546 | GUA6     | 1.958       |
|   | THY |         |        |          |             |
|   |     | None    |        |          |             |

**Mismatched DNA complex****Table S2. The binding mode for the mismatched MutS $\alpha$ -DNA complex****Frame 148****A. Interactions with MSH6**

|    |     | type    | donor  | acceptor | distance, Å |
|----|-----|---------|--------|----------|-------------|
|    | ADE |         |        |          |             |
|    |     | None    |        |          |             |
|    | CTY |         |        |          |             |
| 1  |     | C-H...O | PRO47  | CYT11    | 2.879       |
| 2  |     | C-H...O | LYS70  | CYT7     | 2.973       |
| 3  |     | C-H...O | LYS70  | CYT7     | 2.626       |
| 4  |     | C-H...O | TRP95  | CYT11    | 2.944       |
| 5  |     | O-H...O | TYR108 | CYT10    | 2.777       |
| 6  |     | C-H...O | TYR108 | CYT10    | 2.892       |
| 7  |     | C-H...O | PRO128 | CYT9     | 2.973       |
| 8  |     | C-H...O | PRO128 | CYT9     | 2.970       |
| 9  |     | C-H...O | PRO128 | CYT9     | 2.849       |
| 10 |     | C-H...O | ARG136 | CYT2     | 2.922       |
| 11 |     | C-H...O | ARG136 | CYT2     | 2.918       |
| 12 |     | O-H...O | TYR484 | CYT9     | 1.824       |
| 13 |     | C-H...N | CYT7   | ARG613   | 2.736       |
| 14 |     | C-H...O | CYT9   | GLN124   | 2.990       |
| 15 |     | C-H...O | CYT9   | VAL68    | 2.983       |
| 16 |     | C-H...N | CYT2   | ARG146   | 2.493       |

|    | GUA |         |        |       |       |
|----|-----|---------|--------|-------|-------|
| 1  |     | N-H...N | LYS70  | GUA8  | 2.700 |
| 2  |     | C-H...O | LYS70  | GUA8  | 2.632 |
| 3  |     | N-H...O | LYS70  | GUA8  | 1.871 |
| 4  |     | C-H...N | PHE71  | GUA9  | 2.785 |
| 5  |     | C-H...N | PHE71  | GUA8  | 2.442 |
| 6  |     | C-H...O | LEU88  | GUA9  | 2.819 |
| 7  |     | N-H...O | VAL89  | GUA9  | 2.305 |
| 8  |     | C-H...O | PRO101 | GUA9  | 2.689 |
| 9  |     | C-H...N | PRO101 | GUA9  | 2.924 |
| 10 |     | C-H...O | PRO101 | GUA9  | 2.986 |
| 11 |     | C-H...N | PRO101 | GUA9  | 2.947 |
| 12 |     | C-H...N | PRO101 | GUA9  | 2.601 |
| 13 |     | O-H...O | TYR108 | GUA9  | 2.236 |
| 14 |     | C-H...O | VAL147 | GUA10 | 2.769 |
| 15 |     | N-H...O | VAL148 | GUA10 | 1.917 |
| 16 |     | O-H...O | TYR484 | GUA8  | 2.898 |
| 17 |     | N-H...O | GUA8   | VAL68 | 1.936 |
|    | THY |         |        |       |       |
| 1  |     | C-H...N | MET91  | THY8  | 2.922 |
| 2  |     | N-H...O | TRP609 | THY14 | 1.986 |
| 3  |     | C-H...O | ILE611 | THY13 | 2.341 |
| 4  |     | N-H...O | GLY612 | THY13 | 2.101 |

## B. Interactions with MSH2

|   |     | type    | donor  | acceptor | distance, Å |
|---|-----|---------|--------|----------|-------------|
|   | ADE |         |        |          |             |
| 1 |     | C-H...O | LYS528 | ADE4     | 2.226       |
| 2 |     | N-H...O | LYS528 | ADE4     | 1.781       |
|   | CYT |         |        |          |             |
| 1 |     | N-H...O | LYS546 | CYT7     | 1.551       |
|   | GUA |         |        |          |             |
| 1 |     | C-H...O | GLN545 | GUA6     | 2.978       |
| 2 |     | C-H...O | GLN545 | GUA6     | 2.332       |
| 3 |     | N-H...O | LYS546 | GUA6     | 2.156       |
| 4 |     | C-H...O | LYS546 | GUA6     | 2.783       |
|   | THY |         |        |          |             |
| 1 |     | C-H...N | THY3   | LYS528   | 2.980       |

## Frame 15

## A. Interactions with MSH6

|    |     | type     | donor  | acceptor | distance, Å |
|----|-----|----------|--------|----------|-------------|
|    | ADE |          |        |          |             |
|    |     | None     |        |          |             |
|    | CYT |          |        |          |             |
| 1  |     | C-H...O  | PRO47  | CYT11    | 2.769       |
| 2  |     | C-H...O  | PRO47  | CYT11    | 2.830       |
| 3  |     | N-H...O  | GLY48  | CYT11    | 2.782       |
| 4  |     | C-H...O  | LYS70  | CYT7     | 2.943       |
| 5  |     | C-H...O  | CYS135 | CYT1     | 2.665       |
| 6  |     | C-H...O  | ILE141 | CYT1     | 2.649       |
| 7  |     | C-H...O  | ARG146 | CYT1     | 2.585       |
| 8  |     | O-H...O  | TYR484 | CYT9     | 1.683       |
| 9  |     | O-H...O  | TYR484 | CYT9     | 2.953       |
| 10 |     | N-H...O  | LYS636 | CYT5     | 2.712       |
| 11 |     | N-H...O  | LYS636 | CYT5     | 2.976       |
| 12 |     | C-H...N  | CYT4   | LYS639   | 2.753       |
| 13 |     | C-H...N  | CYT9   | ARG150   | 2.955       |
| 14 |     | C-H...N  | CYT9   | GLY69    | 2.861       |
|    | GUA |          |        |          |             |
| 1  |     | C-H...N  | GLY69  | GUA8     | 2.879       |
| 2  |     | C-H...O  | GLY69  | GUA8     | 2.927       |
| 3  |     | N-H...O  | LYS70  | GUA8     | 2.995       |
| 4  |     | N-H...N  | LYS70  | GUA8     | 2.957       |
| 5  |     | N-H...N  | LYS70  | GUA8     | 1.952       |
| 6  |     | C-H...O  | LYS70  | GUA8     | 2.949       |
| 7  |     | C-H...N  | LYS70  | GUA8     | 2.705       |
| 8  |     | C-H...N  | LYS70  | GUA8     | 2.918       |
| 9  |     | C-H...N  | LYS70  | GUA9     | 2.997       |
| 10 |     | N-H...O  | LYS70  | GUA8     | 1.658       |
| 11 |     | C-H...O  | PHE71  | GUA9     | 2.939       |
| 12 |     | C-H...N  | PHE71  | GUA9     | 2.615       |
| 13 |     | C-H...O  | LYS92  | GUA7     | 2.839       |
| 14 |     | C-H...O  | LYS92  | GUA7     | 2.728       |
| 15 |     | C-H...O  | PRO101 | GUA9     | 2.713       |
| 16 |     | C-H...N  | PRO101 | GUA9     | 2.973       |
| 17 |     | C-H...O  | VAL147 | GUA10    | 2.652       |
| 18 |     | N-H...O  | VAL148 | GUA10    | 1.969       |
| 19 |     | C-H...O  | TYR484 | GUA8     | 2.569       |
| 20 |     | C-H...O  | LYS636 | GUA6     | 2.818       |
| 21 |     | N-H...O  | LYS636 | GUA6     | 1.603       |
| 22 |     | C-H...N  | GUA6   | LYS636   | 2.931       |
| 23 |     | N-H...O  | GUA8   | VAL68    | 1.992       |
| 24 |     | C-H...pi | GUA8   | TYR484   | 3.916       |

|    |     |          |        |        |       |
|----|-----|----------|--------|--------|-------|
| 25 |     | C-H...pi | GUA8   | TYR484 | 4.291 |
|    | THY |          |        |        |       |
| 1  |     | C-H...O  | MET91  | THY8   | 2.937 |
| 2  |     | N-H...O  | TRP609 | THY13  | 2.576 |
| 3  |     | C-H...O  | LYS639 | THY14  | 2.673 |
| 4  |     | C-H...O  | LYS639 | THY14  | 2.354 |
| 5  |     | C-H...pi | THY8   | PHE71  | 4.465 |

### B. Interactions with MSH2.

|   |     | type    | donor  | acceptor | distance, Å |
|---|-----|---------|--------|----------|-------------|
|   | ADE |         |        |          |             |
| 1 |     | C-H...O | LYS509 | ADE4     | 2.697       |
| 2 |     | N-H...N | LYS509 | ADE4     | 2.804       |
| 3 |     | O-H...O | THR526 | ADE4     | 1.758       |
| 4 |     | C-H...O | LYS528 | ADE4     | 2.438       |
| 5 |     | C-H...O | LYS528 | ADE4     | 2.746       |
|   | CYT |         |        |          |             |
| 1 |     | C-H...O | LYS6   | CYT10    | 2.928       |
| 2 |     | C-H...O | ALA517 | CYT4     | 2.818       |
| 3 |     | C-H...O | GLN518 | CYT4     | 2.913       |
| 4 |     | C-H...O | LYS546 | CYT7     | 2.834       |
| 5 |     | C-H...O | LYS546 | CYT7     | 2.525       |
|   | GUA |         |        |          |             |
| 1 |     | C-H...O | LYS6   | GUA11    | 2.809       |
| 2 |     | N-H...O | LYS6   | GUA11    | 1.602       |
| 3 |     | N-H...O | LYS509 | GUA5     | 2.123       |
| 4 |     | N-H...O | LYS512 | GUA5     | 1.663       |
| 5 |     | C-H...O | GLN545 | GUA6     | 2.771       |
| 6 |     | C-H...O | GLN545 | GUA6     | 2.616       |
| 7 |     | C-H...O | GLN545 | GUA6     | 2.774       |
| 8 |     | N-H...O | LYS546 | GUA6     | 1.921       |
|   | THY |         |        |          |             |
| 1 |     | C-H...O | LYS528 | THY3     | 2.840       |
| 2 |     | N-H...O | LYS528 | THY3     | 1.500       |

### Frame 79

#### A. Interactions with MSH6

|  |     | type | donor | acceptor | distance, Å |
|--|-----|------|-------|----------|-------------|
|  | ADE |      |       |          |             |
|  |     | None |       |          |             |
|  | CYT |      |       |          |             |



|    |     |         |        |       |       |
|----|-----|---------|--------|-------|-------|
| 1  |     | C-H...O | THR46  | CYT11 | 2.648 |
| 2  |     | O-H...O | THR46  | CYT11 | 2.420 |
| 3  |     | C-H...O | PRO47  | CYT11 | 2.890 |
| 4  |     | C-H...O | PRO47  | CYT11 | 2.561 |
| 5  |     | N-H...O | GLY48  | CYT11 | 2.286 |
| 6  |     | C-H...O | LYS70  | CYT7  | 2.481 |
| 7  |     | C-H...O | TYR108 | CYT10 | 2.572 |
| 8  |     | O-H...O | TYR108 | CYT10 | 1.819 |
| 9  |     | C-H...O | PRO128 | CYT9  | 2.913 |
| 10 |     | C-H...O | HIS140 | CYT1  | 2.643 |
| 11 |     | N-H...O | ILE141 | CYT1  | 1.920 |
| 12 |     | O-H...O | TYR484 | CYT9  | 1.816 |
| 13 |     | N-H...O | LYS636 | CYT5  | 2.298 |
|    | GUA |         |        |       |       |
| 1  |     | N-H...N | LYS70  | GUA8  | 2.197 |
| 2  |     | C-H...O | LYS70  | GUA8  | 2.729 |
| 3  |     | C-H...N | LYS70  | GUA8  | 2.943 |
| 4  |     | N-H...N | PHE71  | GUA8  | 2.759 |
| 5  |     | C-H...N | PHE71  | GUA8  | 2.746 |
| 6  |     | C-H...O | PHE71  | GUA9  | 2.892 |
| 7  |     | C-H...N | PHE71  | GUA9  | 2.490 |
| 8  |     | C-H...N | PHE71  | GUA8  | 2.681 |
| 9  |     | N-H...O | VAL89  | GUA9  | 2.742 |
| 10 |     | C-H...O | MET91  | GUA7  | 2.964 |
| 11 |     | C-H...N | PRO101 | GUA9  | 2.876 |
| 12 |     | O-H...O | TYR108 | GUA9  | 2.717 |
| 13 |     | C-H...O | VAL147 | GUA10 | 2.874 |
| 14 |     | N-H...O | VAL148 | GUA10 | 2.075 |
| 15 |     | O-H...O | TYR484 | GUA8  | 2.523 |
| 16 |     | C-H...O | ILE611 | GUA12 | 2.924 |
| 17 |     | C-H...O | ARG613 | GUA8  | 2.641 |
| 18 |     | C-H...O | LYS636 | GUA6  | 2.552 |
| 19 |     | N-H...O | LYS636 | GUA6  | 1.711 |
| 20 |     | C-H...N | GUA8   | LYS70 | 2.998 |
| 21 |     | N-H...O | GUA8   | VAL68 | 2.004 |
| 22 |     | C-H...O | GUA7   | MET91 | 2.675 |
| 23 |     | C-H...O | GUA9   | GLY99 | 2.834 |
|    | THY |         |        |       |       |
| 1  |     | C-H...O | MET91  | THY8  | 2.871 |
| 2  |     | C-H...O | MET91  | THY8  | 2.756 |
| 3  |     | C-H...O | MET91  | THY8  | 2.413 |
| 4  |     | C-H...O | GLY99  | THY8  | 2.899 |
| 5  |     | C-H...O | TRP609 | THY14 | 2.600 |
| 6  |     | N-H...O | TRP609 | THY13 | 2.528 |
| 7  |     | C-H...O | THY8   | GLY99 | 2.880 |

**B. Interactions with MSH2**

|   |     | type    | donor  | acceptor | distance, Å |
|---|-----|---------|--------|----------|-------------|
|   | ADE |         |        |          |             |
| 1 |     | C-H...O | GLN510 | ADE4     | 2.487       |
| 2 |     | O-H...O | THR526 | ADE4     | 1.803       |
| 3 |     | C-H...O | LYS528 | ADE4     | 2.789       |
| 4 |     | C-H...O | LYS528 | ADE4     | 2.906       |
|   | CYT |         |        |          |             |
| 1 |     | N-H...O | LYS546 | CYT7     | 1.644       |
|   | GUA |         |        |          |             |
| 1 |     | N-H...O | LYS6   | GUA11    | 1.669       |
|   | THY |         |        |          |             |
| 1 |     | N-H...O | LYS528 | THY3     | 1.584       |

**Frame 47****A. Interactions with MSH6**

|    |     | type    | donor  | acceptor | distance, Å |
|----|-----|---------|--------|----------|-------------|
|    | ADE |         |        |          |             |
| 1  |     | C-H...N | LYS639 | ADE3     | 2.865       |
|    | CYT |         |        |          |             |
| 1  |     | C-H...O | PRO47  | CYT11    | 2.476       |
| 2  |     | C-H...O | PRO47  | CYT11    | 2.903       |
| 3  |     | C-H...O | PRO47  | CYT11    | 2.871       |
| 4  |     | C-H...O | LYS70  | CYT7     | 2.559       |
| 5  |     | N-H...O | LYS70  | CYT7     | 2.789       |
| 6  |     | O-H...O | TYR108 | CYT10    | 1.878       |
| 7  |     | C-H...O | TYR484 | CYT9     | 2.569       |
| 8  |     | O-H...O | TYR484 | CYT9     | 1.761       |
| 9  |     | N-H...O | LYS639 | CYT4     | 2.404       |
| 10 |     | N-H...O | LYS639 | CYT4     | 2.383       |
| 11 |     | N-H...O | LYS639 | CYT4     | 2.926       |
|    | GUA |         |        |          |             |
| 1  |     | N-H...N | LYS70  | GUA8     | 2.812       |
| 2  |     | N-H...N | LYS70  | GUA8     | 2.018       |
| 3  |     | C-H...N | LYS70  | GUA8     | 2.793       |
| 4  |     | C-H...N | LYS70  | GUA8     | 2.975       |
| 5  |     | C-H...N | LYS70  | GUA8     | 2.930       |
| 6  |     | N-H...O | LYS70  | GUA8     | 1.841       |
| 7  |     | N-H...N | PHE71  | GUA8     | 2.540       |

|    |     |          |        |        |       |
|----|-----|----------|--------|--------|-------|
| 8  |     | C-H...N  | PHE71  | GUA8   | 2.912 |
| 9  |     | C-H...N  | PHE71  | GUA9   | 2.512 |
| 10 |     | C-H...N  | PHE71  | GUA8   | 2.679 |
| 11 |     | C-H...N  | PHE71  | GUA8   | 2.892 |
| 12 |     | C-H...O  | PRO101 | GUA9   | 2.915 |
| 13 |     | C-H...N  | PRO101 | GUA9   | 2.749 |
| 14 |     | O-H...O  | TYR108 | GUA9   | 2.450 |
| 15 |     | C-H...O  | VAL147 | GUA10  | 2.894 |
| 16 |     | C-H...O  | VAL147 | GUA10  | 2.369 |
| 17 |     | N-H...O  | VAL148 | GUA10  | 2.119 |
| 18 |     | N-H...O  | LYS636 | GUA6   | 1.737 |
| 19 |     | N-H...O  | GUA8   | VAL68  | 1.650 |
| 20 |     | N-H...N  | GUA8   | LYS70  | 2.955 |
| 21 |     | C-H...pi | GUA8   | TYR484 | 4.013 |
| 22 |     | C-H...pi | GUA8   | TYR484 | 3.958 |
|    | THY |          |        |        |       |
| 1  |     | C-H...O  | MET91  | THY8   | 2.763 |
| 2  |     | C-H...O  | MET91  | THY8   | 2.905 |
| 3  |     | C-H...O  | TRP609 | THY14  | 2.726 |
| 4  |     | N-H...O  | TRP609 | THY13  | 2.123 |
| 5  |     | C-H...O  | LYS639 | THY14  | 2.713 |
| 6  |     | C-H...O  | LYS639 | THY14  | 2.877 |
| 7  |     | C-H...O  | LYS639 | THY14  | 2.985 |
| 8  |     | C-H...N  | THY13  | TRP609 | 2.711 |

## B. Interactions with MSH2

|    |     | type    | donor  | acceptor | distance, Å |
|----|-----|---------|--------|----------|-------------|
|    | ADE |         |        |          |             |
| 1  |     | C-H...O | THR526 | ADE4     | 2.921       |
| 2  |     | O-H...O | THR526 | ADE4     | 1.680       |
| 3  |     | C-H...N | ADE4   | GLN510   | 2.801       |
|    | CYT |         |        |          |             |
| 1  |     | C-H...O | LYS6   | CYT10    | 2.772       |
| 2  |     | N-H...O | LYS546 | CYT7     | 1.751       |
|    | GUA |         |        |          |             |
| 1  |     | N-H...O | LYS6   | GUA11    | 2.556       |
| 2  |     | N-H...O | LYS6   | GUA11    | 2.307       |
| 3  |     | N-H...O | LYS509 | GUA14    | 2.032       |
| 4  |     | C-H...O | LYS512 | GUA5     | 2.810       |
| 5  |     | N-H...O | LYS512 | GUA5     | 1.818       |
| 6  |     | C-H...O | GLN545 | GUA6     | 2.409       |
| 7  |     | N-H...O | LYS546 | GUA6     | 1.996       |
| 8  |     | N-H...O | LYS546 | GUA6     | 2.964       |
| 9  |     | C-H...O | LYS546 | GUA6     | 2.655       |
| 10 |     | C-H...O | LYS546 | GUA6     | 2.857       |

|   |     |         |        |      |       |
|---|-----|---------|--------|------|-------|
|   | THY |         |        |      |       |
| 1 |     | C-H...O | LYS528 | THY3 | 2.914 |

### Frame 192

#### A. Interactions with MSH6

|    |     | type    | donor  | acceptor | distance, Å |
|----|-----|---------|--------|----------|-------------|
|    | ADE |         |        |          |             |
|    |     | None    |        |          |             |
|    | CYT |         |        |          |             |
| 1  |     | C-H...O | THR46  | CYT11    | 2.712       |
| 2  |     | C-H...O | PRO47  | CYT11    | 2.808       |
| 3  |     | C-H...O | PRO47  | CYT11    | 2.592       |
| 4  |     | C-H...O | PRO47  | CYT11    | 2.577       |
| 5  |     | N-H...O | GLY48  | CYT11    | 2.628       |
| 6  |     | O-H...O | TYR108 | CYT10    | 2.165       |
| 7  |     | C-H...O | TYR108 | CYT10    | 2.881       |
| 8  |     | C-H...O | PRO128 | CYT9     | 2.728       |
| 9  |     | O-H...O | TYR484 | CYT9     | 1.694       |
| 10 |     | C-H...O | ARG604 | CYT15    | 2.757       |
| 11 |     | C-H...O | LYS636 | CYT5     | 2.780       |
| 12 |     | C-H...O | LYS639 | CYT15    | 2.919       |
|    | GUA |         |        |          |             |
| 1  |     | N-H...O | LYS70  | GUA8     | 2.704       |
| 2  |     | N-H...N | LYS70  | GUA8     | 2.630       |
| 3  |     | C-H...O | LYS70  | GUA8     | 2.428       |
| 4  |     | C-H...N | PHE71  | GUA8     | 2.657       |
| 5  |     | C-H...N | PHE71  | GUA9     | 2.663       |
| 6  |     | C-H...N | PHE71  | GUA9     | 2.869       |
| 7  |     | C-H...N | PHE71  | GUA8     | 2.817       |
| 8  |     | C-H...O | LEU88  | GUA9     | 2.582       |
| 9  |     | N-H...O | VAL89  | GUA9     | 1.811       |
| 10 |     | C-H...O | PRO101 | GUA9     | 2.816       |
| 11 |     | C-H...N | PRO101 | GUA9     | 2.644       |
| 12 |     | O-H...O | TYR108 | GUA9     | 2.646       |
| 13 |     | C-H...O | TYR108 | GUA9     | 2.783       |
| 14 |     | C-H...O | VAL147 | GUA10    | 2.752       |
| 15 |     | C-H...O | VAL147 | GUA10    | 2.691       |
| 16 |     | N-H...O | VAL148 | GUA10    | 2.117       |
| 17 |     | O-H...O | TYR484 | GUA8     | 2.768       |
| 18 |     | N-H...O | GUA8   | GLU73    | 2.942       |
| 19 |     | N-H...O | GUA8   | VAL68    | 1.805       |
|    | THY |         |        |          |             |
| 1  |     | C-H...O | GLU73  | THY8     | 2.801       |
| 2  |     | C-H...O | MET91  | THY8     | 2.903       |

|    |  |         |        |        |       |
|----|--|---------|--------|--------|-------|
| 3  |  | C-H...O | MET91  | THY8   | 2.763 |
| 4  |  | C-H...O | GLY99  | THY8   | 2.652 |
| 5  |  | N-H...O | TRP609 | THY13  | 1.847 |
| 6  |  | C-H...O | LYS639 | THY14  | 2.898 |
| 7  |  | C-H...O | LYS639 | THY 14 | 2.755 |
| 8  |  | C-H...O | THY8   | VAL89  | 2.942 |
| 9  |  | N-H...O | THY8   | GLU73  | 2.291 |
| 10 |  | C-H...O | THY8   | GLY99  | 2.605 |

### B. Interactions with MSH2

|   |     | type    | donor  | acceptor | distance, Å |
|---|-----|---------|--------|----------|-------------|
|   | ADE |         |        |          |             |
| 1 |     | C-H...O | LYS110 | ADE2     | 2.732       |
| 2 |     | N-H...O | LYS110 | ADE2     | 1.787       |
|   | CYT |         |        |          |             |
| 1 |     | C-H...O | GLN545 | CYT5     | 2.964       |
| 2 |     | C-H...O | LYS546 | CYT7     | 2.671       |
| 3 |     | N-H...O | LYS546 | CYT7     | 1.727       |
| 4 |     | C-H...N | CYT5   | GLN545   | 2.431       |
|   | GUA |         |        |          |             |
| 1 |     | C-H...O | LYS6   | GUA11    | 2.560       |
| 2 |     | N-H...O | LYS6   | GUA11    | 1.732       |
| 3 |     | C-H...O | GLN545 | GUA6     | 2.528       |
| 4 |     | C-H...O | GLN545 | GUA6     | 2.395       |
| 5 |     | C-H...O | GLN545 | GUA6     | 2.540       |
| 6 |     | N-H...O | LYS546 | GUA6     | 1.770       |
| 7 |     | C-H...O | ASN547 | GUA5     | 2.880       |
| 8 |     | C-H...O | ASN547 | GUA5     | 2.740       |
|   | THY |         |        |          |             |
|   |     | None    |        |          |             |

### Frame 102

#### A. Interactions with MSH6

|   |     | type    | donor | acceptor | distance, Å |
|---|-----|---------|-------|----------|-------------|
|   | ADE |         |       |          |             |
|   |     | None    |       |          |             |
|   | CYT |         |       |          |             |
| 1 |     | C-H...O | THR46 | CYT11    | 2.913       |
| 2 |     | O-H...O | THR46 | CYT11    | 2.482       |
| 3 |     | C-H...O | PRO47 | CYT11    | 2.769       |

|    |     |          |        |        |       |
|----|-----|----------|--------|--------|-------|
| 4  |     | C-H...O  | PRO47  | CYT11  | 2.526 |
| 5  |     | N-H...O  | GLY48  | CYT11  | 1.926 |
| 6  |     | C-H...O  | GLY48  | CYT11  | 2.889 |
| 7  |     | C-H...O  | GLY69  | CYT9   | 2.610 |
| 8  |     | C-H...O  | LYS70  | CYT7   | 2.824 |
| 9  |     | C-H...O  | PRO101 | CYT10  | 2.970 |
| 10 |     | C-H...O  | TYR108 | CYT10  | 2.748 |
| 11 |     | O-H...O  | TYR108 | CYT10  | 2.545 |
| 12 |     | C-H...O  | PRO128 | CYT9   | 2.863 |
| 13 |     | C-H...O  | PRO128 | CYT9   | 2.971 |
| 14 |     | C-H...O  | PRO128 | CYT9   | 2.728 |
| 15 |     | C-H...O  | HIS140 | CYT1   | 2.901 |
| 16 |     | N-H...O  | HIS140 | CYT1   | 2.014 |
| 17 |     | N-H...O  | ILE141 | CYT1   | 1.966 |
| 18 |     | O-H...O  | TYR484 | CYT9   | 2.381 |
| 19 |     | N-H...O  | LYS640 | CYT15  | 1.873 |
| 20 |     | C-H...O  | CYT9   | GLN124 | 2.633 |
| 21 |     | C-H...N  | CYT9   | GLN124 | 2.994 |
| 22 |     | C-H...N  | CYT9   | GLY69  | 2.659 |
| 23 |     | C-H...O  | CYT9   | VAL68  | 2.611 |
|    | GUA |          |        |        |       |
| 1  |     | N-H...O  | LYS70  | GUA8   | 2.969 |
| 2  |     | N-H...N  | LYS70  | GUA8   | 2.032 |
| 3  |     | C-H...O  | LYS70  | GUA8   | 2.447 |
| 4  |     | C-H...N  | LYS70  | GUA8   | 2.682 |
| 5  |     | N-H...N  | PHE71  | GUA8   | 2.591 |
| 6  |     | C-H...N  | PHE71  | GUA8   | 2.862 |
| 7  |     | C-H...O  | PHE71  | GUA9   | 2.691 |
| 8  |     | C-H...N  | PHE71  | GUA8   | 2.664 |
| 9  |     | C-H...N  | PHE71  | GUA8   | 2.863 |
| 10 |     | C-H...O  | PRO101 | GUA9   | 2.692 |
| 11 |     | C-H...O  | ILE103 | GUA11  | 2.508 |
| 12 |     | C-H...O  | TYR108 | GUA9   | 2.922 |
| 13 |     | O-H...O  | TYR108 | GUA9   | 2.056 |
| 14 |     | C-H...O  | VAL147 | GUA10  | 2.880 |
| 15 |     | N-H...O  | VAL148 | GUA10  | 2.002 |
| 16 |     | C-H...O  | ILE611 | GUA12  | 2.907 |
| 17 |     | N-H...O  | ARG613 | GUA8   | 2.199 |
| 18 |     | C-H...O  | LYS636 | GUA6   | 2.379 |
| 19 |     | C-H...N  | GUA8   | LYS70  | 2.995 |
| 20 |     | N-H...O  | GUA8   | VAL68  | 1.714 |
| 21 |     | C-H...O  | GUA7   | MET91  | 2.933 |
| 22 |     | C-H...pi | GUA8   | TYR484 | 4.222 |
|    | THY |          |        |        |       |
| 1  |     | C-H...O  | MET91  | THY8   | 2.541 |
| 2  |     | N-H...O  | TRP609 | THY13  | 1.881 |
| 3  |     | O-H...O  | THR638 | THY14  | 1.874 |
| 4  |     | C-H...O  | LYS639 | THY14  | 2.749 |

**B. Interactions with MSH2**

|   |     | type    | donor  | acceptor | distance, Å |
|---|-----|---------|--------|----------|-------------|
|   | ADE |         |        |          |             |
| 1 |     | O-H...O | THR526 | ADE4     | 1.855       |
| 2 |     | N-H...O | LYS528 | ADE4     | 1.898       |
|   | CYT |         |        |          |             |
| 1 |     | N-H...O | LYS546 | CYT7     | 1.693       |
|   | GUA |         |        |          |             |
| 1 |     | N-H...O | LYS 6  | GUA11    | 1.610       |
| 2 |     | C-H...O | LYS509 | GUA14    | 2.879       |
| 3 |     | C-H...O | LYS512 | GUA5     | 2.551       |
| 4 |     | N-H...O | LYS512 | GUA5     | 1.895       |
| 5 |     | N-H...O | LYS512 | GUA5     | 2.410       |
|   | THY |         |        |          |             |
|   |     | None    |        |          |             |

**Frame 180****A. Interactions with MSH6**

|    |     | type    | donor  | acceptor | distance, Å |
|----|-----|---------|--------|----------|-------------|
|    | ADE |         |        |          |             |
|    |     | None    |        |          |             |
|    | CYT |         |        |          |             |
| 1  |     | C-H...O | THR46  | CYT11    | 2.833       |
| 2  |     | C-H...O | PRO47  | CYT11    | 2.641       |
| 3  |     | N-H...O | GLY48  | CYT11    | 2.464       |
| 4  |     | C-H...O | TRP95  | CYT11    | 2.707       |
| 5  |     | O-H...O | TYR108 | CYT10    | 1.873       |
| 6  |     | C-H...O | TYR108 | CYT10    | 2.766       |
| 7  |     | C-H...O | HIS140 | CYT1     | 2.872       |
| 8  |     | N-H...O | ILE141 | CYT1     | 1.853       |
| 9  |     | C-H...O | ILE141 | CYT1     | 2.906       |
| 10 |     | C-H...O | ILE141 | CYT2     | 2.764       |
| 11 |     | O-H...O | TYR484 | CYT9     | 1.990       |
| 12 |     | C-H...O | ARG604 | CYT15    | 2.972       |
| 13 |     | N-H...O | ARG604 | CYT15    | 1.764       |
| 14 |     | C-H...N | THR605 | CYT15    | 2.817       |
| 15 |     | C-H...O | THR605 | CYT15    | 2.519       |
| 16 |     | C-H...O | LYS636 | CYT5     | 2.511       |
| 17 |     | C-H...N | CYT7   | ARG613   | 2.926       |
| 18 |     | C-H...O | CYT9   | TYR484   | 2.940       |
| 19 |     | C-H...N | CYT9   | GLY69    | 2.725       |
| 20 |     | O-H...N | CYT1   | HIS140   | 2.637       |
| 21 |     | O-H...N | CYT1   | HIS140   | 2.870       |

|    | GUA |          |        |         |       |
|----|-----|----------|--------|---------|-------|
| 1  |     | C-H...N  | GLY69  | GUA8    | 2.903 |
| 2  |     | N-H...N  | LYS70  | GUA8    | 2.376 |
| 3  |     | C-H...O  | LYS70  | GUA8    | 2.943 |
| 4  |     | C-H...O  | LYS70  | GUA8    | 2.412 |
| 5  |     | C-H...N  | PHE71  | GUA8    | 2.812 |
| 6  |     | C-H...N  | PHE71  | GUA9    | 2.690 |
| 7  |     | C-H...N  | PHE71  | GUA9    | 2.847 |
| 8  |     | C-H...N  | PHE71  | GUA8    | 2.790 |
| 9  |     | C-H...O  | LEU88  | GUA9    | 2.759 |
| 10 |     | N-H...O  | VAL89  | GUA9    | 2.507 |
| 11 |     | N-H...O  | LYS92  | GUA7    | 1.547 |
| 12 |     | C-H...O  | PRO101 | GUA9    | 2.862 |
| 13 |     | O-H...O  | TYR108 | GUA9    | 2.316 |
| 14 |     | C-H...O  | VAL147 | GUA10   | 2.926 |
| 15 |     | C-H...O  | VAL147 | GUA10   | 2.599 |
| 16 |     | N-H...O  | VAL148 | GUA10   | 2.494 |
| 17 |     | O-H...O  | TYR484 | GUA8    | 2.570 |
| 18 |     | C-H...O  | ARG613 | GUA8    | 2.955 |
| 19 |     | N-H...O  | ARG613 | GUA8    | 1.680 |
| 20 |     | N-H...O  | GUA8   | VAL68   | 1.875 |
| 21 |     | C-H...S  | GUA7   | MET91   | 2.800 |
| 22 |     | C-H...pi | GUA8   | TYR484  | 4.123 |
|    | THY |          |        |         |       |
| 1  |     | C-H...O  | GLU73  | THY8    | 2.669 |
| 2  |     | C-H...O  | TRP609 | THY14   | 2.751 |
| 3  |     | N-H...O  | TRP609 | THY13   | 2.308 |
| 4  |     | C-H...O  | LYS639 | THY14   | 2.667 |
| 5  |     | C-H...O  | LYS639 | THY14   | 2.797 |
| 6  |     | N-H...O  | LYS639 | THY14   | 2.207 |
| 7  |     | N-H...O  | LYS643 | THY14   | 1.785 |
| 8  |     | C-H...N  | THY13  | TRP609  | 2.781 |
| 9  |     | C-H...pi | THY8   | PHE71   | 4.206 |
| 10 |     | C-H...pi | THY13  | PR5 609 | 4.684 |

### B. Interactions with MSH2

|   |     | type    | donor  | acceptor | distance, Å |
|---|-----|---------|--------|----------|-------------|
|   | ADE |         |        |          |             |
| 1 |     | N-H...O | LYS110 | ADE2     | 1.626       |
|   | CYT |         |        |          |             |
| 1 |     | C-H...O | LYS6   | CYT10    | 2.598       |
| 2 |     | C-H...O | LYS546 | CYT7     | 2.847       |
| 3 |     | N-H...O | LYS546 | CYT7     | 1.645       |
| 4 |     | C-H...N | CYT5   | GLN545   | 2.562       |



|   |     |         |        |       |       |
|---|-----|---------|--------|-------|-------|
|   | GUA |         |        |       |       |
| 1 |     | C-H...O | LYS6   | GUA11 | 2.926 |
| 2 |     | N-H...O | LYS512 | GUA5  | 1.741 |
| 3 |     | C-H...O | GLN545 | GUA6  | 2.558 |
| 4 |     | C-H...O | GLN545 | GUA6  | 2.740 |
| 5 |     | N-H...O | LYS546 | GUA6  | 1.729 |
| 6 |     | C-H...O | LYS546 | GUA6  | 2.545 |
|   | THY |         |        |       |       |
|   |     | None    |        |       |       |

### Frame 218

#### A. Interactions with MSH6

|    |     | type    | donor  | acceptor | distance, Å |
|----|-----|---------|--------|----------|-------------|
|    | ADE |         |        |          |             |
|    |     | None    |        |          |             |
|    | CYT |         |        |          |             |
| 1  |     | C-H...O | PRO47  | CYT11    | 2.732       |
| 2  |     | N-H...O | LYS92  | CYT11    | 2.915       |
| 3  |     | N-H...O | LYS92  | CYT11    | 2.752       |
| 4  |     | C-H...O | ILE103 | CYT10    | 2.896       |
| 5  |     | O-H...O | TYR484 | CYT9     | 2.285       |
| 6  |     | N-H...O | GLY612 | CYT7     | 2.654       |
| 7  |     | N-H...O | ARG613 | CYT7     | 1.823       |
| 8  |     | C-H...O | ARG613 | CYT7     | 2.470       |
| 9  |     | C-H...O | ARG613 | CYT7     | 2.653       |
| 10 |     | C-H...O | ARG613 | CYT7     | 2.848       |
| 11 |     | N-H...O | ASN614 | CYT7     | 2.960       |
| 12 |     | N-H...O | LYS636 | CYT5     | 2.091       |
| 13 |     | N-H...O | LYS639 | CYT15    | 2.852       |
| 14 |     | C-H...O | LYS639 | CYT15    | 2.353       |
| 15 |     | C-H...O | LYS639 | CYT15    | 2.418       |
| 16 |     | C-H...O | LYS639 | CYT15    | 2.958       |
| 17 |     | N-H...O | LYS639 | CYT15    | 1.986       |
| 18 |     | C-H...O | CYT9   | TYR484   | 2.736       |
|    | GUA |         |        |          |             |
| 1  |     | C-H...N | GLY69  | GUA8     | 2.777       |
| 2  |     | N-H...N | LYS70  | GUA8     | 2.736       |
| 3  |     | C-H...O | LYS70  | GUA8     | 2.789       |
| 4  |     | C-H...O | LYS70  | GUA8     | 2.548       |
| 5  |     | N-H...O | LYS70  | GUA8     | 1.781       |
| 6  |     | C-H...N | PHE71  | GUA8     | 2.855       |
| 7  |     | C-H...O | PHE71  | GUA9     | 2.575       |
| 8  |     | C-H...N | PHE71  | GUA9     | 2.878       |
| 9  |     | C-H...N | PHE71  | GUA8     | 2.710       |

|    |     |         |        |       |       |
|----|-----|---------|--------|-------|-------|
| 10 |     | C-H...O | PRO101 | GUA9  | 2.749 |
| 11 |     | C-H...O | PRO101 | GUA9  | 2.914 |
| 12 |     | C-H...O | VAL147 | GUA10 | 2.762 |
| 13 |     | C-H...O | VAL147 | GUA10 | 2.237 |
| 14 |     | N-H...O | VAL148 | GUA10 | 1.967 |
| 15 |     | O-H...O | TYR484 | GUA8  | 2.561 |
| 16 |     | C-H...O | ILE611 | GUA6  | 2.998 |
| 17 |     | C-H...O | ILE611 | GUA6  | 2.790 |
| 18 |     | N-H...O | ARG613 | GUA8  | 1.817 |
| 19 |     | C-H...O | LYS636 | GUA6  | 2.991 |
| 20 |     | C-H...O | LYS636 | GUA6  | 2.665 |
| 21 |     | N-H...O | LYS636 | GUA6  | 2.911 |
| 22 |     | N-H...O | GUA8   | VAL68 | 1.934 |
| 23 |     | C-H...O | GUA7   | MET91 | 2.806 |
|    | THY |         |        |       |       |
| 1  |     | C-H...O | PHE71  | THY8  | 2.799 |
| 2  |     | C-H...O | MET91  | THY8  | 2.514 |
| 3  |     | C-H...O | MET91  | THY8  | 2.992 |
| 4  |     | C-H...O | GLY99  | THY8  | 2.418 |
| 5  |     | C-H...O | TRP609 | THY13 | 2.864 |
| 6  |     | C-H...O | THY8   | PHE90 | 2.879 |
| 7  |     | C-H...O | THY8   | GLY99 | 2.563 |

## B. Interactions with MSH2

|   |     | type    | donor  | acceptor | distance, Å |
|---|-----|---------|--------|----------|-------------|
|   | ADE |         |        |          |             |
| 1 |     | C-H...O | ASN109 | ADE2     | 2.714       |
| 2 |     | C-H...O | LYS509 | ADE4     | 2.547       |
| 3 |     | N-H...O | LYS509 | ADE4     | 2.847       |
| 4 |     | O-H...O | THR526 | ADE4     | 1.753       |
| 5 |     | C-H...O | LYS528 | ADE4     | 2.732       |
| 6 |     | C-H...O | LYS528 | ADE4     | 2.754       |
| 7 |     | N-H...O | LYS528 | ADE4     | 1.890       |
| 8 |     | C-H...O | ADE4   | LYS509   | 2.413       |
|   | CYT |         |        |          |             |
| 1 |     | C-H...O | LYS6   | CYT10    | 2.718       |
| 2 |     | C-H...O | LYS546 | CYT7     | 2.756       |
| 3 |     | N-H...O | LYS546 | CYT7     | 1.701       |
|   | GUA |         |        |          |             |
| 1 |     | C-H...O | LYS6   | GUA11    | 2.682       |
| 2 |     | C-H...O | LYS6   | GUA11    | 2.874       |
| 3 |     | N-H...O | LYS6   | GUA11    | 1.508       |
| 4 |     | C-H...O | LYS110 | GUA1     | 2.811       |
| 5 |     | C-H...O | LYS512 | GUA5     | 2.542       |
| 6 |     | N-H...O | LYS512 | GUA5     | 1.724       |
| 7 |     | C-H...O | GLN545 | GUA6     | 2.746       |

|    |     |         |        |      |       |
|----|-----|---------|--------|------|-------|
| 8  |     | C-H...O | GLN545 | GUA6 | 2.889 |
| 9  |     | C-H...O | GLN545 | GUA6 | 2.700 |
| 10 |     | N-H...O | LYS546 | GUA6 | 2.063 |
|    | THY |         |        |      |       |
| 1  |     | N-H...O | LYS509 | THY3 | 1.821 |
| 2  |     | C-H...O | LYS528 | THY3 | 2.686 |

**Table S3. Protein-DNA hydrogen bonds in the solved MutS $\alpha$ -DNA complex , 208B (MSH2/MSH6 bound to ADP and a G-T mismatch)**

|           |             | donor  | acceptor | type    | distance, Å |
|-----------|-------------|--------|----------|---------|-------------|
| <b>1</b>  | <b>MSH2</b> | LSY6   | CYT10    | C-H...O | 2.738       |
|           |             | LYS6   | GUA11    | C-H...O | 2.831       |
|           |             | LYS6   | CYT10    | C-H...O | 2.706       |
|           |             | LYS6   | CYT10    | C-H...O | 2.807       |
|           |             | LYS6   | CYT10    | C-H...O | 2.496       |
|           |             | LYS6   | GUA11    | N-H...O | 2.315       |
| <b>2</b>  |             | LYS512 | GUA5     | N-H...O | 2.411       |
|           |             | GUA5   | LYS512   | O-H...N | 2.529       |
| <b>3</b>  |             | CYT4   | GLN518   | C-H...O | 2.375       |
| <b>4</b>  |             | CYT5   | GLN545   | C-H...N | 2.870       |
|           |             | GLN545 | GUA6     | C-H...O | 2.951       |
| <b>5</b>  |             | LYS546 | GUA6     | N-H...O | 2.302       |
|           |             | LYS546 | GUA6     | C-H...O | 2.683       |
|           |             | LYS546 | CYT7     | C-H...O | 2.822       |
| <b>6</b>  | <b>MSH6</b> | THR46  | CYT11    | C-H...O | 2.725       |
|           |             | THR46  | CYT11    | O-H...O | 2.830       |
| <b>7</b>  |             | CYT11  | PRO47    | O-H...N | 2.653       |
| <b>8</b>  |             | GLY48  | CYT11    | N-H...O | 2.365       |
|           |             | GLY48  | CYT11    | N-H...O | 1.552       |
|           |             | GLY48  | GUA10    | C-H...O | 2.671       |
|           |             | GLY48  | CYT11    | C-H...O | 2.660       |
|           |             | GLY48  | CYT11    | C-H...O | 2.877       |
| <b>9</b>  |             | MET49  | CYT11    | N-H...O | 2.102       |
| <b>10</b> |             | GUA9   | VAL68    | N-H...O | 1.877       |
| <b>11</b> |             | GLY69  | GUA8     | C-H...N | 2.665       |
|           |             | GLY69  | GUA8     | C-H...O | 2.539       |
|           |             | GLY69  | CYT9     | C-H...O | 2.826       |
|           |             | CYT9   | GLY69    | C-H...N | 2.818       |
| <b>12</b> |             | LYS70  | GUA8     | N-H...O | 2.787       |
|           |             | LYS70  | GUA8     | N-H...N | 2.988       |
|           |             | LYS70  | GUA8     | C-H...O | 2.828       |
|           |             | LYS70  | GUA9     | C-H...N | 2.920       |
|           |             | LYS70  | CYT7     | N-H...O | 2.005       |
|           |             | CYT7   | LYS70    | C-H...N | 2.949       |

|           |  |        |        |         |       |
|-----------|--|--------|--------|---------|-------|
| <b>13</b> |  | PHE71  | GUA9   | C-H...N | 2.962 |
|           |  | PHE71  | CYT7   | C-H...N | 2.908 |
|           |  | PHE71  | GUA9   | C-H...N | 2.542 |
|           |  | PHE71  | GUA8   | C-H...N | 2.774 |
| <b>14</b> |  | GLU73  | THY8   | C-H...O | 2.559 |
| <b>15</b> |  | LEU88  | GUA9   | C-H...O | 2.354 |
| <b>16</b> |  | VAL89  | GUA9   | N-H...O | 1.821 |
|           |  | GUA9   | VAL89  | O-H...N | 1.939 |
| <b>17</b> |  | MET91  | THY8   | C-H...O | 2.799 |
|           |  | MET91  | GUA7   | C-H...O | 2.573 |
|           |  | MET91  | THY8   | C-H...O | 2.848 |
|           |  | MET91  | THY8   | C-H...O | 2.511 |
|           |  | MET91  | GUA7   | C-H...O | 2.915 |
|           |  | MET91  | GUA7   | C-H...O | 2.697 |
| <b>18</b> |  | LYS92  | THY8   | N-H...O | 2.764 |
|           |  | LYS92  | GUA7   | C-H...O | 2.641 |
|           |  | THY8   | LYS92  | O-H...N | 2.808 |
| <b>19</b> |  | GLY99  | THY8   | C-H...O | 2.282 |
|           |  | THY8   | GLY99  | C-H...O | 2.766 |
| <b>20</b> |  | PRO101 | GUA9   | C-H...O | 2.638 |
|           |  | PRO101 | GUA9   | C-H...N | 2.673 |
|           |  | PRO101 | GUA9   | C-H...O | 2.903 |
|           |  | PRO101 | GUA9   | C-H...N | 2.534 |
|           |  | PRO101 | CYT10  | C-H...O | 2.611 |
| <b>21</b> |  | CYT10  | ARG107 | O-H...N | 1.811 |
| <b>22</b> |  | TYR108 | GUA9   | O-H...O | 2.032 |
|           |  | TYR108 | GUA9   | C-H...O | 2.847 |
|           |  | GUA9   | TYR108 | C-H...O | 2.977 |
| <b>23</b> |  | CYT9   | GLN124 | C-H...O | 2.643 |
| <b>24</b> |  | PRO128 | CYT9   | C-H...O | 2.677 |
|           |  | PRO128 | CYT9   | C-H...O | 2.853 |
|           |  | PRO128 | CYT9   | C-H...O | 2.994 |
|           |  | PRO128 | CYT9   | C-H...O | 2.470 |
|           |  | PRO128 | CYT9   | C-H...O | 2.687 |
|           |  | PRO128 | CYT9   | C-H...O | 2.541 |
| <b>25</b> |  | VAL147 | GUA10  | C-H...O | 2.697 |
|           |  | VAL147 | GUA10  | C-H...O | 2.359 |
| <b>26</b> |  | VAL148 | GUA10  | N-H...O | 1.909 |
| <b>27</b> |  | GUA10  | ARG150 | C-H...N | 2.538 |
| <b>28</b> |  | TYR484 | CYT9   | C-H...O | 2.883 |
| <b>29</b> |  | TRP609 | THY13  | C-H...O | 2.310 |
| <b>30</b> |  | ARG613 | GUA8   | N-H...O | 2.706 |
|           |  | ARG613 | GUA8   | N-H...O | 2.598 |
| <b>31</b> |  | THR638 | THY14  | C-H...O | 2.410 |
| <b>32</b> |  | LYS639 | CYT15  | N-H...O | 2.040 |
|           |  | LYS639 | CYT15  | N-H...O | 2.995 |

|           |  |        |       |         |       |
|-----------|--|--------|-------|---------|-------|
|           |  | LYS639 | CYT15 | C-H...O | 2.344 |
| <b>33</b> |  | LYS643 | THY14 | N-H...O | 1.894 |
|           |  | LYS643 | THY14 | N-H...O | 1.922 |

### Conclusion:

In the experimental mismatched MSH2/MSH6 complex there are 33 residues involved in hydrogen bonds with the DNA fragment. Simulations for the same complex predicted 54 such residues, with 13 from MSH2. All but MET49 and ARG107, which is 93.93% of those present in the crystal structure are predicted by simulations, and they are present at least 14.66% of the simulation time.

In addition, all residues predicted to be involved in hydrogen bonding with the DNA fragment during in the entire simulation time are among the experimental.

**Table S4.** Different binding modes for mismatched (mis) and cross-linked (plat) DNA fragments by MutS $\alpha$ .

| Residue |      | Interactions Type                                                                      | % conf     | Residue |      | Interactions Type                                  | % conf     |
|---------|------|----------------------------------------------------------------------------------------|------------|---------|------|----------------------------------------------------|------------|
| Thr46   | mis  | O-H...O, C-H...O; Cyt11                                                                | 32.11      | Val147  | mis  | C-H...O; Gua10;                                    | <b>100</b> |
|         | plat | O-H...O, C-H...O; Cyt11;                                                               | 68.61      |         | plat | C-H...O; Gua10;                                    | 76.25      |
| Pro47   | mis  | C-H...O; Cyt11;                                                                        | <b>100</b> | Val148  | mis  | N-H...O; Gua10;                                    | <b>100</b> |
|         | plat | C-H...O; Cyt11;                                                                        | 90.79      |         | plat | N-H...O; Gua10;                                    | 79.14      |
| Gly48   | mis  | N-H...O; Cyt11;                                                                        | 32.10      | Arg150  | mis  | C-H...N; Cyt9;                                     | 14.66      |
|         | plat | N-H...O; Cyt11;<br>C-H...O; Gua10, Cyt11;                                              | 40.34      |         | plat | C-H...N; Gua10;                                    | 21.73      |
| Val68   | mis  | N-H...O; Gua8; C-H...O; Cyt9;                                                          | <b>100</b> | Tyr484  | mis  | O-H...O, C-H...O; Gua8, Cyt9;                      | <b>100</b> |
|         | plat | N-H...O; Gua8; C-H...O; Gua10;                                                         | 63.28      |         | plat | O-H...O; Gua8, Gua9;                               | 56.80      |
| Gly69   | mis  | C-H...N, C-H...O; Cyt9; Gua8;                                                          | 44.52      | Arg604  | mis  | N-H...O, C-H...O; Cyt15;                           | 15.63      |
|         | plat | C-H...N, C-H...O; Gua8, Gua9;                                                          | 74.23      |         | plat | C-H...O; Cyt15;                                    | 7.17       |
| Lys70   | mis  | N-H...O; Cyt7, Gua8;<br>N-H...N; Gua8;<br>C-H...O; Cyt7, Gua8;<br>C-H...N; Gua8, Gua9; | <b>100</b> | Thr605  | mis  | C-H...O, C-H...N; Cyt15;                           | 8.06       |
|         | plat | N-H...O; Cyt7, Gua8;<br>N-H...N; Gua8;<br>C-H...O; Cyt7, Gua8;<br>C-H...N; Gua8;       | 75.32      |         | plat | -                                                  | 0          |
| Phe71   | mis  | N-H...N; Gua8;<br>C-H...O ; Gua9 ;<br>C-H...N ; Gua8, Gua9 ;                           | <b>100</b> | Trp609  | mis  | N-H...O, C-H...O; Thy13, Thy14;<br>C-H...N; Thy13; | 100        |
|         | plat | C-H...O, C-H...N; Gua8, Gua9;                                                          | 93.53      |         | plat | N-H...O; Thy13, Thy14;<br>C-H...O; Gua10, Thy13;   | 42.42      |
| Glu73   | mis  | N-H...O ; Gua8 ; Thy8 ;<br>C-H...O ; Thy8 ;                                            | 15.63      | Ile611  | mis  | C-H...O; Gua6, Gua12, Thy13;                       | 57.33      |
|         | plat | N-H...O; Gua8, Thy8, Gua10;<br>C-H...O, C-H...N; Thy8;                                 | 82.52      |         | plat | C-H...O; Gua12, Thy13;                             | 9.57       |

|        |      |                                                                               |       |        |      |                                                                                                        |       |
|--------|------|-------------------------------------------------------------------------------|-------|--------|------|--------------------------------------------------------------------------------------------------------|-------|
| Leu88  | mis  | C-H...O ; Gua9 ;                                                              | 39.00 | Gly612 | mis  | N-H...O ; Cyt7 , Thy13 ;                                                                               | 40.85 |
|        | plat | C-H...O; Gua9;                                                                | 75.57 |        | plat | -                                                                                                      | 0     |
| Val89  | mis  | N-H...O ; Gua9                                                                | 51.15 | Arg613 | mis  | N-H...O ; Cyt7, Gua8 ;<br>C-H...O; Cyt7; Gua8;<br>C-H...N; Cyt7;                                       | 65.39 |
|        | plat | N-H...O; Thy8, Gua9;<br>C-H...O; Thy8;                                        | 59.31 |        | plat | C-H...O, C-H...N; Gua8;                                                                                | 27.17 |
| Phe90  | mis  | C-H...O ; Thy8 ;                                                              | 17.47 | Asn614 | mis  | N-H...O; Cyt7;                                                                                         | 17.47 |
|        | plat | C-H...O; Thy8;                                                                | 22.94 |        | plat | -                                                                                                      | 0     |
| Met91  | mis  | C-H...O ; Gua7 ; Thy8 ;                                                       | 100   | Lys636 | mis  | N-H...O, C-H...O ;Cyt5, Gua6;<br>C-H...N ; Gua6 ;                                                      | 76.63 |
|        | plat | C-H...O; Cyt7, Thy8 ;<br>C-H...N ; Cyt7; C-H...S; Thy8;                       | 92.83 |        | plat | N-H...O, C-H...O; Cyt5, Gua6;                                                                          | 29.03 |
| Lys92  | mis  | N-H...O ; Gua7 ; Cyt11 ;<br>C-H...O ; Gua7 ;                                  | 40.19 | Thr638 | mis  | O-H...O ; Thy14 ;                                                                                      | 4.32  |
|        | plat | N-H...O, C-H...O; Cyt6, Cyt7,<br>Thy8; N-H...N; Cyt7; C-H...N;<br>Cyt6, Cyt7; | 67.34 |        | plat | -                                                                                                      | 0     |
| Gly93  | mis  | -                                                                             | 0     | Lys639 | mis  | N-H...O ; Cyt4, Thy14 ;<br>C-H...O ; Thy14, Cyt15 ;<br>C-H...N, Ade3, Cyt4 ;                           | 64.47 |
|        | plat | C-H...O; Cyt6;                                                                | 8.29  |        | plat | N-H...O, C-H...O; Cyt15, Thy14;                                                                        | 63.46 |
| Asn94  | mis  | -                                                                             | 0     | Lys640 | miss | N-H...O ; Cyt15 ;                                                                                      | 4.32  |
|        | plat | C-H...N ; Cyt11 ;                                                             | 8.29  |        | plat | -                                                                                                      | 0     |
| Trp95  | mis  | C-H...O ; Cyt11 ;                                                             | 31.43 | Lys643 | mis  | N-H...O ; Thy14 ;                                                                                      | 8.06  |
|        | plat | -                                                                             | 0     |        | plat | N-H...O ; Thy14 ;                                                                                      | 29.06 |
| Ser98  | mis  | -                                                                             | 0     | Lys6   | mis  | N-H...O ; Gua11 ;<br>C-H...O ; Cyt10, Gua11 ;                                                          | 76.63 |
|        | plat | C-H...O; Thy8;                                                                | 24.93 |        | plat | N-H...O, C-H...O; Cyt10, Gua11;                                                                        | 77.11 |
| Gly99  | mis  | C-H...O ; Thy8 ;                                                              | 37.20 | Asn109 | mis  | C-H...O ; Ade2 ;                                                                                       | 17.47 |
|        | plat | C-H...O; Thy8, Gua9;<br>C-H...N, N-H...O; Thy8;                               | 54.18 |        | plat | -                                                                                                      | 0     |
| Pro101 | mis  | C-H...O, C-H...N; Gua9;                                                       | 100   | Lys110 | mis  | N-H...O; Ade2;<br>C-H...O; Gua1, Ade2 ;                                                                | 33.10 |
|        | plat | C-H...O, C-H...O; Gua9;                                                       | 100   |        | plat | N-H...O; Ade2;                                                                                         | 7.17  |
| Ile103 | mis  | C-H...O ; Cyt10 ; Gua11 ;                                                     | 21.80 | Lys509 | mis  | N-H...O, C-H...O; Ade4; Gua14;                                                                         | 48.84 |
|        | plat | C-H...O; Gua11;                                                               | 8.29  |        | plat | N-H...O; Thy3, Ade4, Gua14;<br>N-H...N; Ade4, Gua14;<br>C-H...O; Ade4, Gua15;<br>C-H...N; Ade4, Gua14; | 43.97 |
| Tyr108 | mis  | O-H...O ; C-H...O ;Gua9 ; Cyt10 ;                                             | 67.86 | Gln510 | mis  | C-H...O, C-H...N; Ade4;                                                                                | 24.55 |
|        | plat | O-H...O, C-H...O; Gua9, Cyt10;                                                | 79.42 |        | plat | -                                                                                                      | 0     |
| Gln124 | mis  | C-H...O ; C-H...N ; Cyt9 ;                                                    | 27.69 | Lys512 | mis  | N-H...O, C-H...O ; Gua5 ;                                                                              | 56.90 |
|        | plat | C-H...O ; Gua9 ;                                                              | 27.22 |        | plat | N-H...O ; Ade4, Gua5 ;<br>C-H...O, C-H...N ; Gua5 ;                                                    | 63.04 |
| Pro128 | mis  | C-H...O ; Cyt9 ;                                                              | 47.42 | Ala517 | mis  | C-H...O ; Cyt4 ;                                                                                       | 14.66 |
|        | plat | C-H...O ; Gua9 ;                                                              | 26.04 |        | plat | -                                                                                                      | 0     |
| Cys135 | mis  | C-H...O ; Cyt1 ;                                                              | 14.66 | Gln518 | mis  | C-H...O ; Cyt4 ;                                                                                       | 14.66 |
|        | plat | C-H...O ; Cyt1, Cyt2 ;                                                        | 22.34 |        | plat | C-H...O ; Cyt4 ;                                                                                       | 13.89 |
| Arg136 | mis  | C-H...O ; Cyt2 ;                                                              | 23.37 | Arg524 | mis  | -                                                                                                      | 0     |
|        | plat | N-H...O, C-H...O, C-H...N ; Cyt2                                              | 22.34 |        | plat | C-H...O ; Gua5 ;                                                                                       | 31.39 |
| Ala139 | mis  | -                                                                             | 0     | Thr526 | mis  | O-H...O; Ade4;                                                                                         | 61.00 |
|        | plat | C-H...O; Cyt1;                                                                | 19.24 |        | plat | O-H...O; Ade4;                                                                                         | 35.78 |

|        |      |                                                   |       |        |      |                                                                      |       |
|--------|------|---------------------------------------------------|-------|--------|------|----------------------------------------------------------------------|-------|
| His140 | mis  | O-H...H, C-H...O ; Cyt1 ;                         | 24.55 | Lys528 | mis  | N-H...O, C-H...O ; Th3, Ade4 ;                                       | 84.37 |
|        | plat | C-H...O, C-H...N ; Cyt1 ;                         | 22.34 |        | plat | N-H...O, C-H...O, C-H...N ; Thy3, Ade4 ;                             | 75.35 |
| Ile141 | mis  | N-H...O ; Cyt1 ;<br>C-H...O ; Cyt1 ; Cyt2 ;       | 39.20 | Gln545 | mis  | C-H...N ; Cyt5 ;<br>C-H...O ; Cyt5, Gua6 ;                           | 83.52 |
|        | plat | N-H...O, C-H...O ; Cyt1 ;<br>C-H...O ; Cyt2 ;     | 22.34 |        | plat | C-H...O ; Cyt5, Gua6 ;<br>C-H...N ; Cyt5 ;                           | 68.64 |
| Lys143 | mis  | -                                                 | 0     | Lys546 | mis  | N-H...O, C-H...O ; Gua6, Cyt7 ;                                      | 100   |
|        | plat | N-H...O, C-H...O ; Thy12 ;                        | 16.78 |        | plat | N-H...O ; Gua6, Cyt7 ;<br>C-H...O ; Gua6 ; C-H...N ; Cyt7 ;          | 90.79 |
| Arg146 | mis  | C-H...O ; Cyt1 ; C-H...N ; Cyt2 ;                 | 38.03 | Asn547 | mis  | C-H...O ; Gua5 ;                                                     | 7.56  |
|        | plat | C-H...O ; Cyt2 ;<br>C-H...N ; Cyt2, Thy3, Gua10 ; | 49.51 |        | plat | N-H...O ; Gua6 ;<br>C-H...O ; Ade4, Gua5, Gua6 ;<br>C-H...N ; Gua5 ; | 36.80 |
|        |      |                                                   |       | Lys550 | mis  | -                                                                    | 0     |
|        |      |                                                   |       |        | plat | N-H...O ; Cyt5 ;                                                     | 20.35 |

### DNA hydrogen bonds analysis: MutS versus MSH2/MSH6

In *Nucleic Acids Research*, 2006, Vol.34, No. 8, there are reported 23 residues of MutS involved in hydrogen bonds with DNA, maintained for more than 90% of the simulation time. When compared with the mismatched MSH2/MSH6, 43.48% of the corresponding MutS homologues are not involved in hydrogen bonds with the DNA fragment.

|    | MutS      | MutSa*  |       |
|----|-----------|---------|-------|
|    | Segment A | MSH6    | %     |
| 1  | MET 31    | GLY 48  | 32.11 |
| 2  | GLU 38    | GLU 73  | 15.63 |
| 3  | THR 56    | MET 91  | 100   |
| 4  | ARG 58    | GLY 93  | 0     |
| 5  | SER 61    | ALA 96  | 0     |
| 6  | GLY 70    | GLY 99  | 37.21 |
| 7  | TYR 79    | TYR 108 | 67.86 |
| 8  | VAL 106   | VAL 148 | 100   |
| 9  | ARG 108   | ARG 150 | 14.66 |
| 10 | GLN 476   | GLN 617 | 0     |
| 11 | LYS 496   | LYS 640 | 4.32  |
| 12 | ARG 500   | ARG 644 | 0     |
|    | Segment B | MSH2    | %     |
| 1  | ARG 32    | ASP 38  | 0     |
| 2  | MET 33    | ARG 39  | 0     |
| 3  | GLY 97    | -       |       |
| 4  | LYS 464   | LYS 512 | 56.9  |
| 5  | ASN 468   | SER 516 | 0     |
| 6  | ALA 469   | ALA 517 | 14.66 |
| 7  | SER 468   | THR 526 | 61    |
| 8  | GLN 493   | ASP 543 | 0     |

|    |         |         |      |
|----|---------|---------|------|
| 9  | LYS 496 | LYS 546 | 100  |
| 10 | ASN 497 | ASN 547 | 7.57 |
| 11 | ARG 500 | LYS 550 | 0    |

Note: \* the mismatched system

If considered the MutS $\alpha$  residues involved in hydrogen bonds with the DNA fragment less than 20% of the simulation time, it corresponds to 21.74% of the similar homologues of MutS residues. Similarly, for those involved in hydrogen bonds present less than 40%, 60%, 80% and 100% of the simulation time, the corresponding MutS residues are representing 30.43%, 34.78%, 39.13% and 43.48%, respectively.

### Dimer Interactions

**Table S5. Interactions at the heterodimer interface in the platinum cross-linked MutS $\alpha$ -DNA complex**

|   | <b>MSH2 donor</b> | <b>MSH6 acceptor</b> | frame #(cluster#)                                                                       | % conf | <b>MSH6 donor</b> | <b>MSH2 acceptor</b> | frame#(cluster#)                                                        | % conf     |
|---|-------------------|----------------------|-----------------------------------------------------------------------------------------|--------|-------------------|----------------------|-------------------------------------------------------------------------|------------|
| 1 | ALA2              | LEU86                | 160(7), 194(8), 283(12), 33(2), 60(1), 83(4)                                            | 60.41  | ARG107            | GLN4                 | 126(3), 194(8), 201(9), 232(10), 272(11), 283(12), 33(2), 83(4)         | 70.47      |
| 2 | LYS6              | ARG107               | 115(5), 142(6), 160(7), 194(8), 201(9), 232(10), 83(4), 33(2)                           | 69.56  | ARG107            | PRO5                 | 160(7), 194(8), 201(9), 232(10), 272(11), 283(12), 33(2)                | 61.17      |
| 3 | ARG55             | GLU399               | 115(5), 126(3), 272(11), 283(12), 83(4)                                                 | 43.81  | SER111            | ALA2                 | 115, 126, 142, 160, 194, 201, 232, 272, 283, 33, 60, 83                 | <b>100</b> |
| 4 | MET83             | GLY87                | 115(5), 126(3), 142(6), 201(9), 33(2), 60(1)                                            | 39.15  | GLY388            | GLN718               | 115(5), 126(3), 142(6), 160(7), 232(10), 60(1)                          | 37.78      |
| 5 | ASN311            | MET823               | 142(6), 160(7), 194(8), 232(10), 272(11), 33(2)                                         | 59.99  | GLY388            | LEU719               | 115, 126, 142, 194, 201, 232, 272, 283, 33, 60, 83                      | 92.73      |
| 6 | ILE544            | SER637               | 115(5), 126(3), 142(6), 160(7), 194(8), 201(9), 232(10), 33(2), 83(4)                   | 72.54  | THR389            | LYS720               | 115, 126, 142, 160, 194, 201, 232, 272, 283, 60, 83                     | 89.21      |
| 7 | ASN671            | GLY857               | 115(5), 126(3), 160(7), 272(11), 283(12), 33(2), 60(1), 83(4)                           | 68.46  | ASN390            | GLY721               | 115(5), 126(3), 160(7), 201(9), 232(10), 272(11), 283(12), 60(1), 83(4) | 66.12      |
| 8 | GLN718            | GLY388               | 115(5), 126(3), 142(6), 160(7), 194(8), 201(9), 232(10), 272(11), 283(12), 33(2), 60(1) | 86.42  | ASN390            | LYS720               | 115(5), 126(3), 160((7) 194(8), 201(9), 232(10), 33(2), 60(1), 83(4)    | 79.13      |



|    |        |        |                                                                                         |       |        |        |                                                                 |       |
|----|--------|--------|-----------------------------------------------------------------------------------------|-------|--------|--------|-----------------------------------------------------------------|-------|
| 9  | LEU719 | ASN390 | 115(5), 126(3), 142(6), 160(7), 272(11), 283(12), 83(4)                                 | 60.19 | LYS636 | ILE544 | 126, 142, 160, 194, 201, 232, 283, 33, 60, 83                   | 80.95 |
| 10 | LYS720 | GLY391 | 115(5), 126(3), 142(6), 160(7), 194(8), 201(9), 232(10), 272(11), 283(12), 33(2), 83(4) | 93.31 | SER637 | ILE544 | 126(3), 142(6), 160(7), 194(8), 201(9), 232(10), 33(2), 83(4)   | 65.98 |
| 11 | LYS720 | GLY395 | 115(5), 126(3), 201(9), 232(10), 272(11), 83(4)                                         | 43.97 | ARG821 | ASP716 | 115(5), 142(6), 160(7), 194(8), 201(9), 232(10), 33(2), 60(1)   | 67.32 |
| 12 | LYS720 | THR393 | 126(3), 194(8), 201(9), 232(10), 272(11), 60(1)                                         | 44.50 | ARG821 | GLY715 | 142(6), 194(8), 201(9), 232(10), 272(11), 283(12)               | 52.42 |
| 13 | ALA733 | ASN946 | 194(8), 232(10), 272(11), 33(2), 60(1)                                                  | 49.30 | MET823 | ASN311 | 115(5), 142(6), 160(7), 194(8), 60(1), 83(4)                    | 57.01 |
| 14 | SER755 | HIS887 | 115(5), 126(3), 194(8), 201(9), 232(10), 272(11), 283(12), 33(2), 60(1), 83(5)          | 83.62 | SER827 | ASN671 | 115, 126, 142, 160, 194, 232, 283, 33, 60, 83                   | 84.32 |
| 15 | GLY761 | GLY955 | 115, 126, 142, 160, 194, 201, 232, 272, 283, 33, 60, 83                                 | 100   | THR828 | ASN671 | 115, 126, 142, 160, 194, 201, 232, 272, 283, 33, 60, 83         | 100   |
| 16 | LYS773 | GLU950 | 126(3), 160(7), 194(8), 201(9), 232(10), 272(11), 283(12), 33(2), 60(1)                 | 70.75 | PHE829 | ASN671 | 115, 126, 142, 160, 201, 232, 272, 283, 33, 60, 83              | 86.11 |
| 17 | HIS785 | THR860 | 115(5), 142(6), 160(7), 272(11), 283(12), 33(2), 60(1)                                  | 61.20 | ALA859 | HIS783 | 126(3), 160(7), 272(11), 283(12), 33(2), 60(1)                  | 48.41 |
| 18 | SER825 | ASP862 | 126(3), 142(6), 160(7), 272(11), 283(12), 33(2)                                         | 57.76 | ALA865 | ALA844 | 115, 126, 142, 160, 194, 201, 232, 272, 283, 33, 60, 83         | 100   |
| 19 | GLY827 | ASP852 | 115(5), 126(3), 142(6), 160(7), 194(8), 272(11), 283(12), 60(1), 83(4)                  | 80.77 | ALA869 | ALA844 | 142(6), 160(7), 194(8), 283(12), 33(2)                          | 52.45 |
| 20 | ILE828 | ASP862 | 115, 126, 142, 160, 194, 201, 232, 272, 283, 33, 60, 83                                 | 100   | ALA869 | VAL840 | 142(6), 160(7), 201(9), 232(10), 272(11), 283(12), 33(2), 60(1) | 63.18 |
| 21 | PHE836 | LEU833 | 126(3), 160(7), 272(11), 283(12), 33(2), 83(4)                                          | 55.30 | HIS887 | GLY753 | 142(6), 83(4), 115(5), 194(8), 201(9), 232(10), 33(2), 60(1)    | 69.08 |

|    |        |        |                                                                        |       |        |        |                                                                        |       |
|----|--------|--------|------------------------------------------------------------------------|-------|--------|--------|------------------------------------------------------------------------|-------|
| 22 | ALA844 | ALA865 | 126(3), 160(7), 194(8), 201(9), 283(12), 33(2)                         | 46.13 | HIS887 | THR754 | 115(5), 126(3), 142(6), 160(7), 194(8), 83(4)                          | 53.21 |
| 23 | LYS847 | ASN868 | 115(5), 126(3), 142(6), 160(7), 201(9), 232(10), 272(11), 33(2), 60(1) | 64.24 | LYS935 | ASP758 | 115, 126, 142, 160, 194, 201, 232, 272, 283, 33, 60, 83                | 100   |
| 24 | LYS847 | ASP894 | 142(6), 160(7), 194(8), 201(9), 232(10), 272(11), 33(2), 60(1)         | 68.78 | PHE939 | ASP758 | 115(5), 142(6), 194(8), 201(9), 232(10), 283(12), 33(2), 60(1), 83(4)  | 77.37 |
| 25 |        |        |                                                                        |       | ALA945 | MET729 | 126(3), 194(8), 272(11), 283(12), 33(2), 83(4)                         | 62.02 |
| 26 |        |        |                                                                        |       | LYS954 | GLU768 | 115(5), 126(3), 142(6), 194(8), 201(9), 272(11), 283(12), 33(2), 83(4) | 80.80 |
| 27 |        |        |                                                                        |       | GLY955 | GLY761 | 115, 126, 142, 160, 194, 201, 232, 272, 283, 33, 60, 83                | 100   |
| 28 |        |        |                                                                        |       | ALA959 | TYR757 | 115, 126, 142, 160, 194, 201, 232, 272, 283, 33, 60, 83                | 100   |
| 29 |        |        |                                                                        |       | ARG973 | GLN850 | 115(5), 126(3), 142(6), 160(7), 272(11), 283(12)                       | 46.61 |

### Dimer Interactions

**Table S6. Interactions at the heterodimer interface in the mismatched MutS $\alpha$ -DNA complex**

|   | <b>MSH2 donor</b> | <b>MSH6 acceptor</b> | frame #(cluster#)                           | % conf | <b>MSH6 donor</b> | <b>MSH2 acceptor</b> | frame#(cluster#)                             | % conf |
|---|-------------------|----------------------|---------------------------------------------|--------|-------------------|----------------------|----------------------------------------------|--------|
| 1 | MET1              | SER111               | 15(1), 180(6), 218(8), 47(2), 79(3)         | 64.73  | ARG107            | GLN4                 | 102, 148, 15, 180, 192, 218, 47, 79          | 100    |
| 2 | LYS6              | ARG107               | 148(5), 15(1), 180(6), 218(8), 47(2), 79(3) | 88.12  | ARG107            | PRO5                 | 102(4), 148(5), 15(1), 218(8), 47(2)         | 72.20  |
| 3 | GLN61             | SER171               | 15(1), 180(6), 192(7), 47(2), 79(3)         | 54.82  | SER111            | ALA2                 | 148(5), 15(1), 180(6), 192(7), 218(8), 47(2) | 87.84  |
| 4 | ILE544            | SER637               | 102, 148, 15, 180, 192, 218, 47, 79         | 100    | SER171            | THR60                | 102(4), 15(1), 180(6), 192(7), 47(2), 79(3)  | 82.53  |

|    |        |        |                                              |       |        |        |                                              |       |
|----|--------|--------|----------------------------------------------|-------|--------|--------|----------------------------------------------|-------|
| 5  | ASN671 | GLY857 | 148(5), 15(1), 180(6), 192(7), 218(8), 47(2) | 83.50 | GLY388 | GLY721 | 102(4), 15(1), 192(7), 47(2), 79(3)          | 51.08 |
| 6  | SER717 | THR389 | 102(4), 15(1), 192(7), 218(8), 79(3)         | 64.25 | GLY388 | LYS720 | 148(5), 15(1), 192(7), 218(8), 79(3)         | 75.22 |
| 7  | GLN718 | THR389 | 102, 15, 180, 192, 218, 47, 79               | 76.63 | THR389 | GLY721 | 102(4), 15(1), 180(6), 192(7), 47(2), 79(3)  | 59.16 |
| 8  | LEU719 | THR389 | 102(4), 15(1), 218(8), 47(2), 79(3)          | 60.99 | THR389 | SER723 | 102, 148, 15, 180, 192, 218, 47              | 87.84 |
| 9  | LYS720 | ASN387 | 102(4), 1591), 180(6), 192(7), 47(2), 79(3)  | 56.21 | ASN390 | GLY721 | 102, 148, 15, 180, 192, 47, 79               | 82.53 |
| 10 | LYS720 | GLU394 | 102(4), 15(1), 180(6), 192(7), 47(2), 79(3)  | 76.63 | GLY391 | LEU719 | 102(4), 15(1), 180(6), 192(7), 79(3)         | 46.76 |
| 11 | LYS720 | SER392 | 102(4), 148(5), 180(6), 218(8), 79(3)        | 72.96 | LYS636 | ILE544 | 102(4), 15(1), 180(6), 192(7), 218(8), 79(3) | 87.62 |
| 12 | GLY721 | ASN390 | 148(5), 180(6), 192(7), 218(8), 47(2)        | 68.84 | SER637 | ILE544 | 102, 15, 180, 192, 218, 47, 79               | 76.63 |
| 13 | MET729 | ALA942 | 15(1), 180(6), 192(7), 47(2), 79(3)          | 54.82 | PRO774 | GLY753 | 102(4), 148(5), 180(6), 47(2), 79(3)         | 60.29 |
| 14 | GLY753 | ASN775 | 148(5), 15(1), 180(6), 192(7), 79(3)         | 65.81 | ASN775 | GLY753 | 102, 148, 15, 180, 192, 47, 79               | 82.53 |
| 15 | TYR757 | ASN966 | 102(4), 148(5), 180(6), 192(7), 218(8)       | 60.78 | MET776 | MET726 | 148 (5), 180(6), 192(7), 218(8)              | 56.46 |
| 16 | TYR757 | GLU893 | 148(5), 15(1), 192(7), 218(8), 47(2), 79(3)  | 87.60 | ASP820 | SER717 | 148(5), 180(6), 192(7), 218(8)               | 56.46 |
| 17 | GLY761 | GLY955 | 102(4), 148(5), 15(1), 180(6), 218(8), 79(3) | 80.06 | SER827 | ASN671 | 148(5), 15(1), 180(6), 192(7), 218(8), 47(2) | 83.52 |
| 18 | ALA765 | VAL951 | 102(4), 15(1), 180(6), 47(2), 79(3)          | 51.58 | THR828 | ASN671 | 180(6), 192(7), 47(2), 79(3)                 | 40.16 |
| 19 | TYR769 | GLU950 | 102(4), 148(5), 15(1), 218(8), 79(3)         | 71.98 | PHE829 | ASN671 | 148(5), 180(6), 192(7), 218(8), 79(3)        | 68.62 |
| 20 | GLY827 | ASP826 | 148(5), 15(1), 180(6), 218(8), 47(2), 79(3)  | 88.10 | ALA837 | ASN835 | 102(4), 148(5), 192(7), 218(8), 79(3)        | 64.88 |
| 21 | ILE828 | ASP862 | 148(5), 15(1), 180(6), 192(7), 218(8), 79(3) | 83.30 | ALA859 | SER825 | 102(4), 148(5), 15(1), 192(7), 47(2)         | 62.29 |
| 22 | PHE836 | LEU833 | 102(4), 15(1), 180(6), 192(7), 47(2), 79(3)  | 59.14 | THR860 | HIS783 | 148(5), 180(6), 218(8), 47(2)                | 61.28 |

|    |  |  |  |  |        |        |                                              |       |
|----|--|--|--|--|--------|--------|----------------------------------------------|-------|
| 23 |  |  |  |  | PHE861 | GLN855 | 102(4), 180(6), 47(2), 79(3)                 | 36.92 |
| 24 |  |  |  |  | ALA865 | ALA844 | 102, 148, 15, 180, 192, 218, 47, 79          | 100   |
| 25 |  |  |  |  | ALA869 | ALA844 | 102(4), 148(5), 192(7), 218(8), 47(2), 79(3) | 77.26 |
| 26 |  |  |  |  | ALA869 | VAL840 | 102, 148, 15, 180, 192, 218, 47, 79          | 100   |
| 27 |  |  |  |  | HIS887 | THR754 | 148(5), 15(1), 192(7), 218(8), 47(2)         | 75.44 |
| 28 |  |  |  |  | TYR888 | THR756 | 148(5), 180(6), 192(7), 218(8), 79(3)        | 68.62 |
| 29 |  |  |  |  | HIS889 | SER755 | 148(5), 180(6), 192(7), 218(8), 79(3)        | 68.62 |
| 30 |  |  |  |  | HIS889 | THR756 | 148(5), 15(1), 180(6), 192(7), 47(2), 79(3)  | 78.19 |
| 31 |  |  |  |  | SER890 | TYR757 | 148(5), 15(1), 180(6), 192(7), 218(8), 47(2) | 83.50 |
| 32 |  |  |  |  | LYS935 | ASP758 | 148, 15, 180, 192, 218, 47, 79               | 95.68 |
| 33 |  |  |  |  | PHE939 | ASP758 | 102, 148, 15, 180, 192, 47, 79               | 82.53 |
| 34 |  |  |  |  | LYS954 | GLU768 | 102, 148, 15, 180, 192, 218, 47, 79          | 100   |
| 35 |  |  |  |  | GLY955 | GLY761 | 102, 148, 15, 180, 192, 218, 47, 79          | 100   |
| 36 |  |  |  |  | ALA959 | TYR757 | 102(4), 148(5), 15(1), 192(7), 218(8), 79(3) | 79.54 |
| 37 |  |  |  |  | ARG973 | GLU850 | 15(1), 180(6), 192(7), 218(8), 47(2)         | 60.13 |

### Nucleotide binding sites

**Table S7. Hydrogen bonding for ADP molecules at the ATPase binding site in the platinum cross-linked MutS $\alpha$ -DNA complex.**

| MSH2 | frame #(cluster#) | % | MSH6 | frame#(cluster#) | % |
|------|-------------------|---|------|------------------|---|
|------|-------------------|---|------|------------------|---|

|    |        |                                                                                 | conf  |        |                                                         | conf  |
|----|--------|---------------------------------------------------------------------------------|-------|--------|---------------------------------------------------------|-------|
| 1  | ILE648 | 201(9), 33(2), 60(1)                                                            | 20.58 | THR739 | 60(1)                                                   | 6.69  |
| 2  | ALA649 | 126(3), 210(9), 232(10), 272(11), 283(12), 33(2), 60(1)                         | 49.69 | LYS740 | 115, 142, 160, 194, 201, 232, 272, 283, 60, 83          | 86.32 |
| 3  | PHE650 | 126(3), 160(7), 194(8), 201(9), 232(10), 272(11), 283(12), 33(2), 60(1)         | 70.75 | THR741 | 33(2), 60(1)                                            | 17.48 |
| 4  | ILE651 | 115, 126, 142, 160, 194, 201, 232, 272, 283, 33, 60, 83                         | 100   | PHE742 | 160(7), 201(9), 232(10), 33(2), 60(1)                   | 33.10 |
| 5  | ASN653 | 142(6), 194(8)                                                                  | 23.10 | PHE743 | 160(7)                                                  | 7.17  |
| 6  | ASN671 | 126(3), 142(6), 33(2), 60(1)                                                    | 29.58 | ASP746 | 115(5), 272(11), 33(2)                                  | 29.84 |
| 7  | MET672 | 115, 126, 142, 160, 194, 201, 232, 272, 283, 33, 60, 83                         | 100   | PHE747 | 115, 126, 142, 160, 194, 272, 283, 33, 60, 83           | 91.55 |
| 8  | GLY673 | 115, 126, 142, 160, 194, 201, 232, 272, 283, 33, 60, 83                         | 100   | ILE748 | 115, 126, 142, 160, 194, 201, 232, 272, 283, 33, 60, 83 | 100   |
| 9  | GLY674 | 115, 126, 142, 160, 194, 201, 232, 272, 283, 33, 60, 83                         | 100   | ASN750 | 194(8), 201(9), 232(10), 60(1)                          | 29.03 |
| 10 | LYS675 | 115, 126, 142, 160, 194, 201, 232, 272, 283, 33, 60, 83                         | 100   | ASN775 | 115, 126, 142, 160, 194, 272, 60, 83                    | 72.47 |
| 11 | SER676 | 115, 126, 142, 160, 194, 201, 232, 272, 283, 33, 60, 83                         | 100   | MET776 | 115, 126, 142, 160, 194, 201, 232, 272, 283, 33, 60, 83 | 100   |
| 12 | THR677 | 115, 126, 142, 160, 194, 201, 232, 272, 283, 33, 60, 83                         | 100   | GLY777 | 115, 126, 142, 160, 194, 201, 232, 272, 283, 33, 60, 83 | 100   |
| 13 | TYR815 | 115(5), 126(3), 160(7), 194(8), 201(9), 232(10), 272(11), 283(12), 60(1), 83(4) | 80.00 | GLY778 | 115, 126, 142, 160, 194, 201, 232, 272, 283, 33, 60, 83 | 100   |
| 14 | VAL722 | 115(5), 126(3)                                                                  | 9.36  | LYS779 | 115, 126, 142, 160, 201, 232, 272, 283, 33, 60, 83      | 86.11 |

|    |  |  |  |        |                                                                 |       |
|----|--|--|--|--------|-----------------------------------------------------------------|-------|
| 15 |  |  |  | SER780 | 115, 126, 142, 160, 194, 201, 232, 272, 283, 33, 60, 83         | 100   |
| 16 |  |  |  | THR781 | 115, 126, 142, 160, 194, 201, 232, 272, 283, 33, 60, 83         | 100   |
| 17 |  |  |  | ARG784 | 283(12)                                                         | 8.29  |
| 18 |  |  |  | TYR926 | 160(7), 194(8), 201(9), 232(10), 272(11), 283(12), 33(2), 60(1) | 67.86 |
|    |  |  |  | SER824 | 115, 126, 194, 201, 232, 272, 283, 33, 60, 83                   | 83.62 |
|    |  |  |  | GLY825 | 194(8), 201(9), 232(10), 33(2), 60(1)                           | 39.82 |
|    |  |  |  | SER827 | 115(5), 126(3), 83(4)                                           | 22.94 |

Note: in red are the hydrogen bonds made by either MSH2 or MSH6 with the neighboring ADP.

**Table S8. Hydrogen bonding for ADP molecules at the ATPase binding site in the mismatched MutS $\alpha$ -DNA complex.**

|   | <b>MSH2</b> | frame #(cluster#)                                   | % conf | <b>MSH6</b> | frame#(cluster#)                              | % conf |
|---|-------------|-----------------------------------------------------|--------|-------------|-----------------------------------------------|--------|
| 1 | ILE648      | 218(8)                                              | 17.42  | ILE738      | 15(1), 47(2)                                  | 27.04  |
| 2 | ALA649      | 102(4), 148(5), 15(1), 218(8), 79(3)                | 71.93  | LYS740      | 148(5), 180(6), 192(7), 218(8), 47(2), 79(3)  | 81.02  |
| 3 | PHE650      | 102, 148, 15, 192, 218, 47, 79                      | 91.94  | ASN746      | 102(4), 148(5), 15(1), 180(6), 192(7), 47(2)  | 70.35  |
| 4 | ILE651      | 102, 148, 15, 180, 192, 218, 47, 79                 | 100    | PHE747      | 102((4), 180(6), 192(7), 218(8), 47(2), 79(3) | 61.97  |
| 5 | ASN653      | 102(4)                                              | 4.32   | ILE748      | 102, 148, 15, 180, 192, 218, 47, 79           | 100    |
| 6 | ASN671      | 102, 148, 15, 192, 218, 47, 79                      | 91.94  | ASN775      | 148(5)                                        | 23.37  |
| 7 | MET672      | 102, 148, 15, 180, 192, 218, 47, 79                 | 100    | MET776      | 102(4), 148(5), 15(1), 218(8), 47(2), 79(3)   | 84.38  |
| 8 | GLY673      | 102(4), 148(5), 15(1), 180(6), 192(7), 47(2), 79(3) | 82.58  | GLY777      | 102(4), 148(5), 15(1), 218(8), 47(2), 79(3)   | 84.38  |

|    |        |                                              |       |        |                                             |       |
|----|--------|----------------------------------------------|-------|--------|---------------------------------------------|-------|
| 9  | GLY674 | 102, 148, 15, 180, 192, 218, 47, 79          | 100   | GLY778 | 102, 148, 15, 180, 192, 218, 47, 79         | 100   |
| 10 | LYS675 | 102, 148, 15, 180, 192, 218, 47, 79          | 100   | LYS779 | 102, 148, 15, 192, 218, 47, 79              | 91.94 |
| 11 | SER676 | 102, 148, 15, 180, 192, 218, 47, 79          | 100   | SER780 | 102, 148, 15, 180, 192, 218, 47, 79         | 100   |
| 12 | THR677 | 102, 148, 15, 180, 192, 218, 47, 79          | 100   | THR781 | 102, 148, 15, 180, 192, 218, 47, 79         | 100   |
| 13 | MET813 | 79(3)                                        | 12.16 | TYR926 | 102(4), 15(1), 180(6), 192(7), 47(2), 79(3) | 59.21 |
| 14 | TYR815 | 102(4), 15(1), 180(6), 192(7), 47(2)         | 46.98 | LYS927 | 180(6)                                      | 8.06  |
| 15 | SER723 | 47(2), 79(3), 102(4), 148(5), 180(6), 192(7) | 67.92 | MET823 | 47(2), 192(7)                               | 19.94 |
| 16 | SER724 | 180(6), 192(7)                               | 15.62 | SER824 | 15(1), 79(3), 102(4), 148(5), 192(7)        | 62.07 |
|    |        |                                              |       | GLY825 | 79(3), 148(5), 192(7)                       | 43.09 |
|    |        |                                              |       | SER827 | 79(3)                                       | 12.16 |

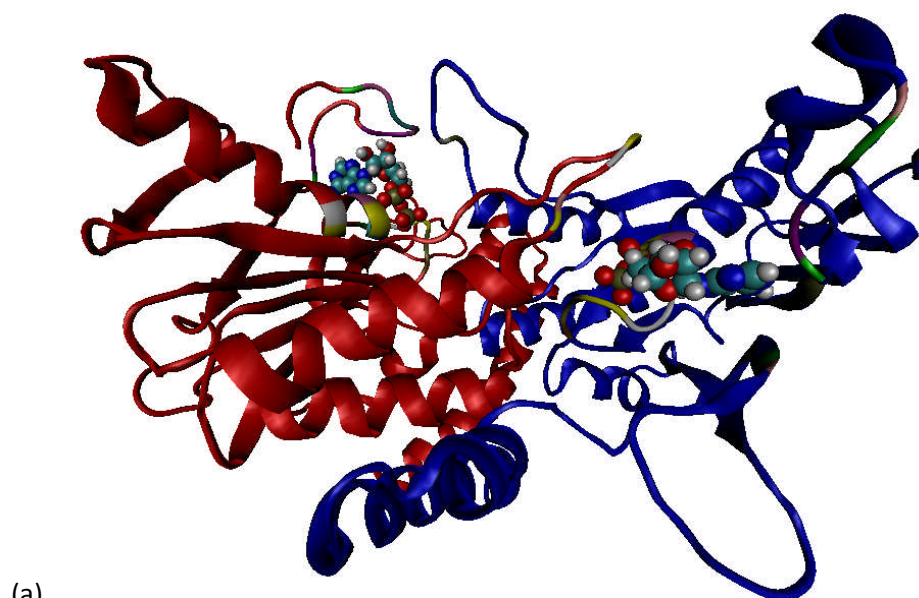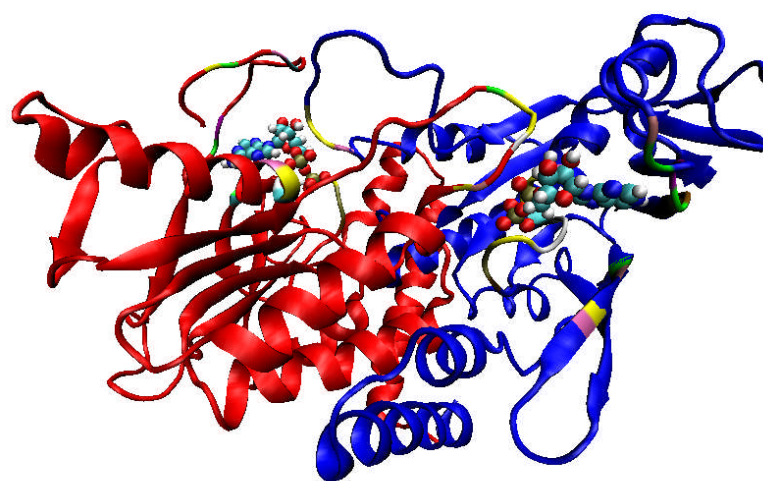

**Figure S3. Nucleotide binding sites in platinum cross-linked (a) and mismatched (b) MutSa-DNA complexes.** Since the ATPase domains in the protein are almost superimposable, the binding modes for ADP molecules are almost identical. Notice the possibility of disorganized loop in either mer to stabilize the alternative ADP molecule.



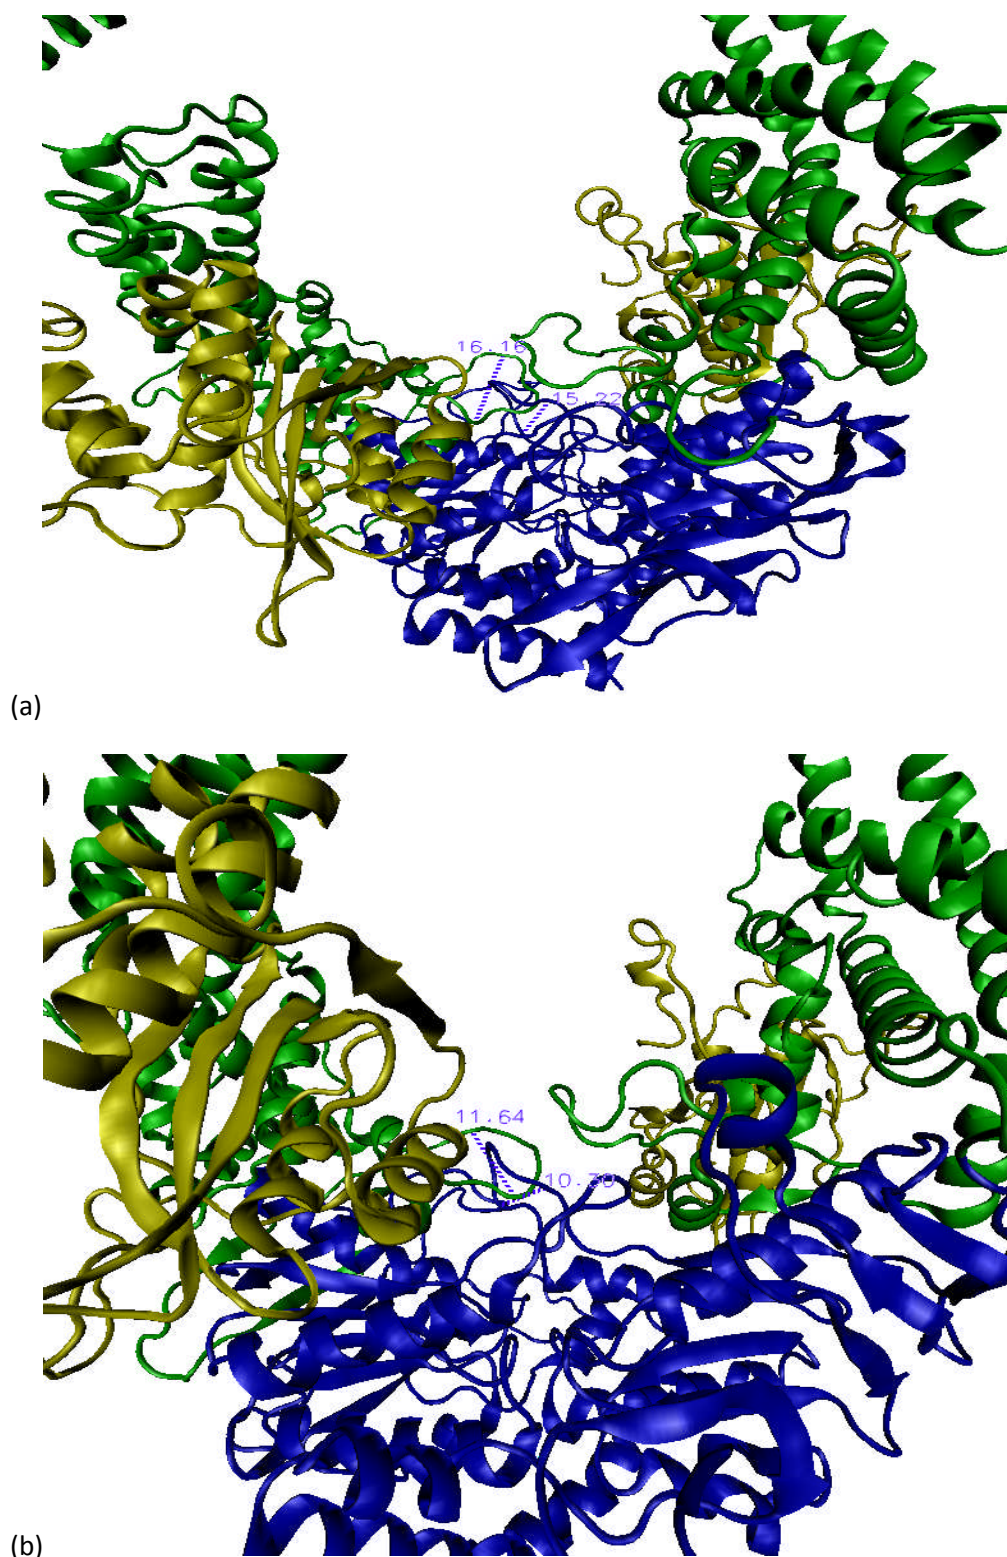

**Figure S4. Allosteric communications between lever and ATPase domains at the heterodimer interface.** In response to the distinctive conformational changes associate with the different binding modes for DNA fragments by MutS $\alpha$ , the wide and contracted interconnected loops in the mismatch complex, panel (a), are narrow and elongated in the platinum cross-linked complex, panel (b). The changes at the lever-ATPase interface are shown in the general context of the multi-domain protein, with the connector domain in yellow, the lever domain in green and the ATPase domain in blue.

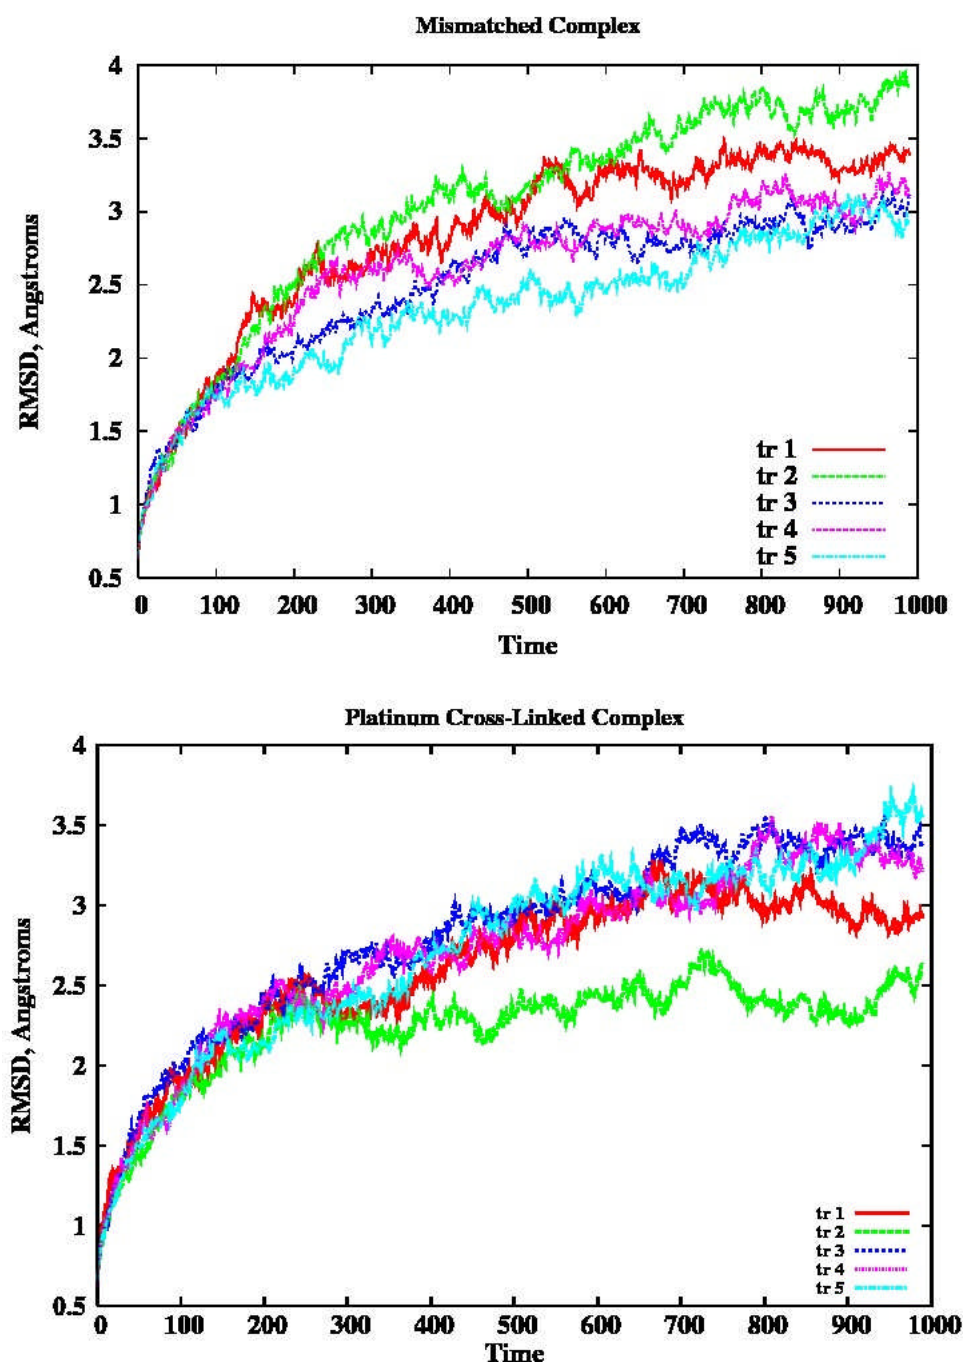

**Figure S5.** C- $\alpha$  root mean square deviations calculated from the initial structure for every 50th snapshot, plotted as a function of time. There are five simulations for each of the mismatched and platinum cross-linked MutS $\alpha$ -DNA complexes. They show that the simulations are equilibrated, with RMSD approximately leveling off at about 5 ns.

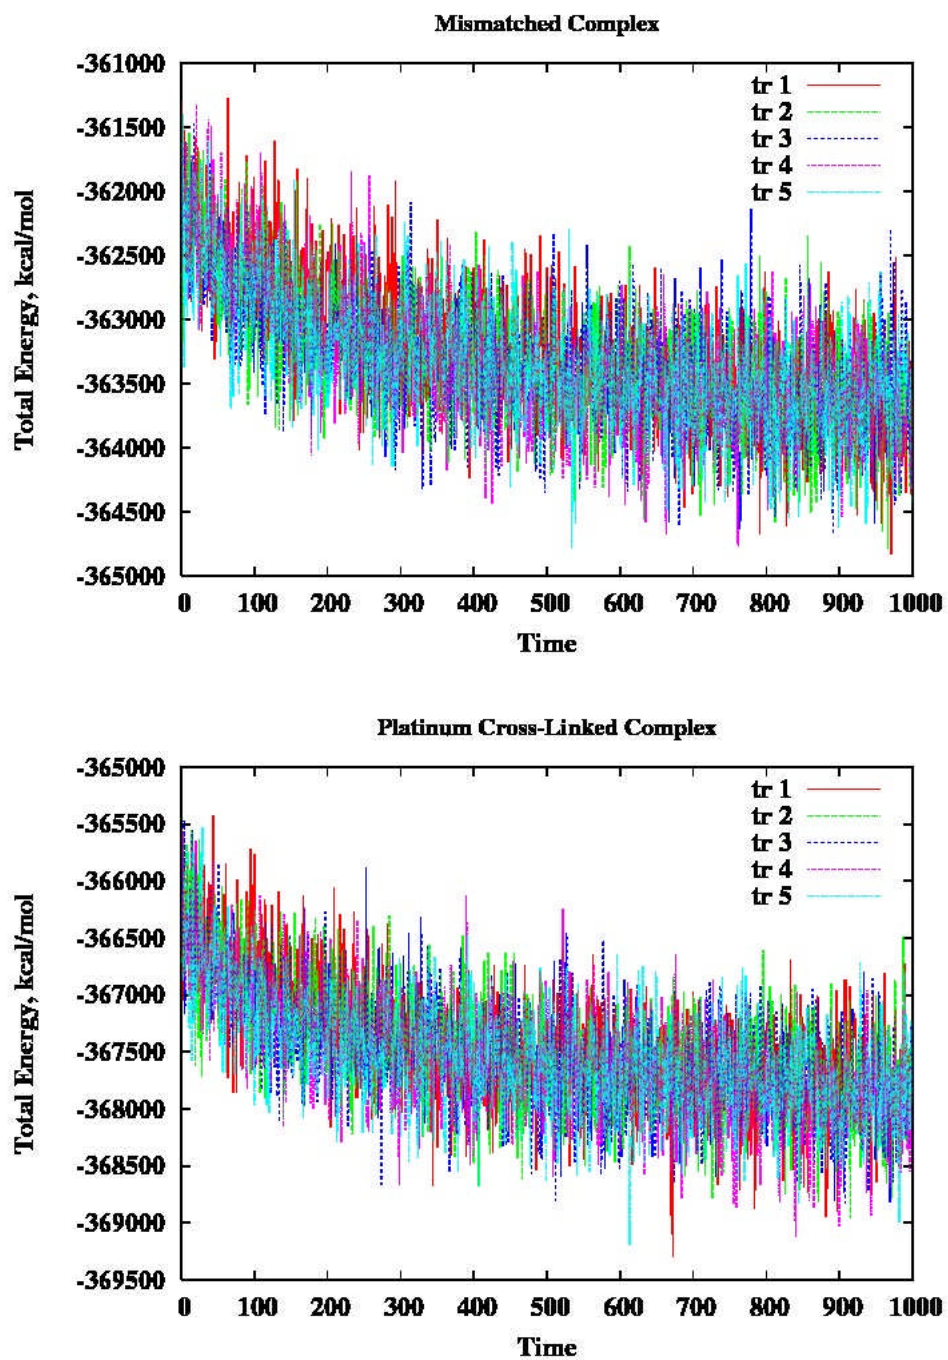

Figure S6. Total energies, presented for every 50th snapshot, for the five simulations of the mismatched and platinum cross-linked MutS $\alpha$ -DNA complexes also show that the systems equilibrate at about 5ns.

|      |       |       |       |       |       |       |       |       |       |       |       |
|------|-------|-------|-------|-------|-------|-------|-------|-------|-------|-------|-------|
| 1 M  | 78 V  | 151 K | 225 T | 298 Q | 371 E | 444 R | 517 A | 590 E | 663 M | 736 L | 809 E |
| 2 A  | 79 V  | 152 M | 226 E | 299 Y | 372 L | 445 S | 518 Q | 591 P | 664 F | 737 R | 810 T |
| 3 V  | 80 L  | 153 S | 227 R | 300 M | 373 R | 446 D | 519 F | 592 M | 665 H | 738 S | 811 L |
| 4 Q  | 81 S  | 154 A | 228 K | 301 K | 374 Q | 447 F | 520 G | 593 Q | 666 I | 739 A | 812 T |
| 5 P  | 82 K  | 155 V | 229 K | 302 L | 375 T | 448 S | 521 Y | 594 T | 667 I | 740 T | 813 M |
| 6 K  | 83 M  | 156 D | 230 A | 303 D | 376 L | 449 K | 522 Y | 595 L | 668 T | 741 K | 814 L |
| 7 E  | 84 N  | 157 G | 231 D | 304 I | 377 Q | 450 F | 523 F | 596 N | 669 G | 742 D | 815 Y |
| 8 T  | 85 F  | 158 Q | 232 F | 305 A | 378 E | 451 Q | 524 R | 597 D | 670 P | 743 S | 816 Q |
| 9 L  | 86 E  | 159 R | 233 S | 306 A | 379 D | 452 E | 525 V | 598 V | 671 N | 744 L | 817 V |
| 10 Q | 87 S  | 160 Q | 234 T | 307 V | 380 L | 453 M | 526 T | 599 L | 672 M | 745 I | 818 K |
| 11 L | 88 F  | 161 V | 235 K | 308 R | 381 L | 454 I | 527 C | 600 A | 673 G | 746 I | 819 K |
| 12 E | 89 V  | 162 G | 236 D | 309 A | 382 R | 455 E | 528 K | 601 Q | 674 G | 747 I | 820 G |
| 13 S | 90 K  | 163 V | 237 I | 310 L | 383 R | 456 T | 529 E | 602 L | 675 K | 748 D | 821 V |
| 14 A | 91 D  | 164 G | 238 Y | 311 N | 384 F | 457 T | 530 E | 603 D | 676 S | 749 E | 822 C |
| 15 A | 92 L  | 165 Y | 239 Q | 312 L | 385 P | 458 L | 531 K | 604 A | 677 T | 750 L | 823 D |
| 16 E | 93 L  | 166 V | 240 D | 313 F | 386 D | 459 D | 532 V | 605 V | 678 Y | 751 G | 824 Q |
| 17 V | 94 L  | 167 D | 241 L | 314 Q | 387 L | 460 M | 533 L | 606 V | 679 I | 752 R | 825 S |
| 18 G | 95 V  | 168 S | 242 N | 315 G | 388 N | 461 D | 534 R | 607 S | 680 R | 753 G | 826 F |
| 19 F | 96 R  | 169 I | 243 R | 316 S | 389 R | 462 Q | 535 N | 608 F | 681 Q | 754 T | 827 G |
| 20 V | 97 Q  | 170 Q | 244 L | 317 V | 390 L | 463 V | 536 N | 609 A | 682 T | 755 S | 828 I |
| 21 R | 98 Y  | 171 R | 245 L | 318 E | 391 A | 464 E | 537 K | 610 H | 683 G | 756 T | 829 H |
| 22 F | 99 R  | 172 K | 246 K | 319 D | 392 K | 465 N | 538 N | 611 V | 684 V | 757 Y | 830 V |
| 23 F | 100 V | 173 L | 247 G | 320 T | 393 K | 466 H | 539 F | 612 S | 685 I | 758 D | 831 A |
| 24 Q | 101 E | 174 G | 248 K | 321 T | 394 F | 467 E | 540 S | 613 N | 686 V | 759 G | 832 E |
| 25 G | 102 V | 175 L | 249 K | 322 G | 395 Q | 468 F | 541 T | 614 G | 687 L | 760 F | 833 L |
| 26 M | 103 Y | 176 C | 250 G | 323 S | 396 R | 469 L | 542 V | 615 A | 688 M | 761 G | 834 A |
| 27 P | 104 K | 177 E | 251 E | 324 Q | 397 Q | 470 V | 543 D | 616 P | 689 A | 762 L | 835 N |
| 28 E | 105 N | 178 F | 252 Q | 325 S | 398 A | 471 K | 544 I | 617 V | 690 Q | 763 A | 836 F |
| 29 K | 106 R | 179 P | 253 M | 326 L | 399 A | 472 P | 545 Q | 618 P | 691 I | 764 W | 837 P |
| 30 P | 107 A | 180 D | 254 N | 327 A | 400 N | 473 S | 546 K | 619 Y | 692 G | 765 A | 838 K |
| 31 T | 108 G | 181 N | 255 S | 328 A | 401 L | 474 F | 547 N | 620 V | 693 C | 766 I | 839 H |
| 32 T | 109 N | 182 D | 256 A | 329 L | 402 Q | 475 D | 548 G | 621 R | 694 F | 767 S | 840 V |
| 33 T | 110 K | 183 Q | 257 V | 330 L | 403 D | 476 P | 549 V | 622 P | 695 V | 768 E | 841 I |
| 34 V | 111 A | 185 S | 258 L | 331 N | 404 C | 477 N | 550 K | 623 A | 696 P | 769 Y | 842 E |
| 35 R | 112 S | 186 N | 259 P | 332 K | 405 Y | 478 L | 551 F | 624 I | 697 C | 770 I | 843 C |
| 36 L | 113 K | 187 L | 260 E | 333 C | 406 R | 479 S | 552 T | 625 L | 698 E | 771 A | 844 A |
| 37 F | 114 E | 188 E | 261 M | 334 K | 407 L | 480 E | 553 N | 626 E | 699 S | 772 T | 845 K |
| 38 D | 115 N | 189 A | 262 E | 335 T | 408 Y | 481 L | 554 S | 627 K | 700 A | 773 K | 846 Q |
| 39 R | 116 D | 190 L | 263 N | 336 P | 409 Q | 482 R | 555 K | 628 G | 701 E | 774 I | 847 K |
| 40 G | 117 W | 191 L | 264 Q | 337 Q | 410 G | 483 E | 556 L | 629 Q | 702 V | 775 G | 848 A |
| 41 D | 118 Y | 192 I | 265 V | 338 G | 411 I | 484 I | 557 T | 630 G | 703 S | 776 A | 849 L |
| 42 F | 119 L | 193 Q | 266 A | 339 Q | 412 N | 485 M | 558 S | 631 R | 704 I | 777 F | 850 E |
| 43 Y | 120 A | 194 I | 267 V | 340 R | 413 Q | 486 N | 559 L | 632 I | 705 V | 778 C | 851 L |
| 44 T | 121 Y | 195 G | 268 S | 341 L | 414 L | 487 D | 560 N | 633 I | 706 D | 779 M | 852 E |
| 45 A | 122 K | 196 P | 269 S | 342 V | 415 P | 488 L | 561 E | 634 L | 707 C | 780 F | 853 E |
| 46 H | 123 A | 197 K | 270 L | 343 N | 416 N | 489 E | 562 E | 635 K | 708 I | 781 A | 854 F |
| 47 G | 124 S | 198 E | 271 S | 344 Q | 417 V | 490 K | 563 Y | 636 A | 709 L | 782 T | 855 Q |
| 48 E | 125 P | 199 C | 272 A | 345 W | 418 I | 491 K | 564 T | 637 S | 710 A | 783 H |       |
| 49 D | 126 G | 200 V | 273 V | 346 I | 419 Q | 492 M | 565 K | 638 R | 711 R | 784 F |       |
| 50 A | 127 N | 201 L | 274 I | 347 K | 420 A | 493 Q | 566 N | 639 H | 712 V | 785 H |       |
| 51 L | 128 L | 202 P | 275 K | 348 Q | 421 L | 494 S | 567 K | 640 A | 713 G | 786 E |       |
| 52 L | 129 S | 203 G | 276 F | 349 P | 422 E | 495 T | 568 T | 641 C | 714 A | 787 L |       |
| 53 A | 130 Q | 204 G | 277 L | 350 L | 423 K | 496 L | 569 E | 642 V | 715 G | 788 T |       |
| 54 A | 131 F | 205 E | 278 E | 351 M | 424 H | 497 I | 570 Y | 643 E | 716 D | 789 A |       |
| 55 R | 132 E | 206 T | 279 L | 352 D | 425 E | 498 S | 571 E | 644 V | 717 S | 790 L |       |
| 56 E | 133 D | 207 A | 280 L | 353 K | 426 G | 499 A | 572 E | 645 Q | 718 Q | 791 A |       |
| 57 V | 134 I | 208 G | 281 S | 354 N | 427 K | 500 A | 573 A | 646 D | 719 L | 792 N |       |
| 58 F | 135 L | 209 D | 282 D | 355 R | 428 H | 501 R | 574 Q | 647 E | 720 K | 793 Q |       |
| 59 K | 136 F | 210 M | 283 D | 356 I | 429 Q | 502 D | 575 D | 648 I | 721 G | 794 I |       |
| 60 T | 137 G | 211 G | 284 S | 357 E | 430 K | 503 L | 576 A | 649 A | 722 V | 795 P |       |
| 61 Q | 138 N | 212 K | 285 N | 358 E | 431 L | 504 G | 577 I | 650 F | 723 S | 796 T |       |
| 62 G | 139 N | 213 L | 286 F | 359 R | 432 L | 505 L | 578 V | 651 I | 724 T | 797 V |       |
| 63 V | 140 D | 214 R | 287 G | 360 L | 433 L | 506 D | 579 K | 652 P | 725 F | 798 N |       |
| 64 I | 141 M | 215 Q | 288 Q | 361 N | 434 A | 507 P | 580 E | 653 N | 726 M | 799 N |       |
| 65 K | 142 S | 216 I | 289 F | 362 L | 435 V | 508 G | 581 I | 654 D | 727 A | 800 L |       |
| 66 Y | 143 A | 217 I | 290 E | 363 V | 436 F | 509 K | 582 V | 655 V | 728 E | 801 H |       |
| 67 M | 144 S | 218 Q | 291 L | 364 E | 437 V | 510 Q | 583 N | 656 Y | 729 M | 802 V |       |
| 68 G | 145 I | 219 R | 292 T | 365 A | 438 T | 511 I | 584 I | 657 F | 730 L | 803 T |       |
| 69 P | 146 G | 220 G | 293 T | 366 F | 439 P | 512 K | 585 S | 658 E | 731 E | 804 A |       |
| 70 A | 147 V | 221 G | 294 F | 367 V | 440 L | 513 L | 586 S | 659 K | 732 T | 805 L |       |
| 71 G | 148 V | 222 I | 295 D | 368 E | 441 T | 514 D | 587 G | 660 D | 733 A | 806 T |       |
| 72 A | 149 G | 223 L | 296 F | 369 D | 442 D | 515 S | 588 Y | 661 K | 734 S | 807 T |       |
| 73 K | 150 V | 224 I | 297 S | 370 A | 443 L | 516 S | 589 V | 662 Q | 735 I | 808 E |       |

**Figure S7.** Residues sequence and numbering for MSH2 subunit: mismatched binding domain, 1 - 124; connector domain, 125-297; leveler domain, 300-456 and 554-619; clamp domain, 457-553; ATP-ase domain, 620-855.



|      |       |       |       |       |       |       |       |       |       |       |       |       |       |
|------|-------|-------|-------|-------|-------|-------|-------|-------|-------|-------|-------|-------|-------|
| 1 P  | 74 L  | 147 V | 220 R | 293 M | 366 T | 439 V | 512 G | 585 E | 658 I | 731 K | 804 C | 877 T | 950 E |
| 2 T  | 75 Y  | 148 V | 221 F | 294 L | 367 K | 440 V | 513 I | 586 N | 659 N | 732 G | 805 R | 878 I | 951 V |
| 3 V  | 76 H  | 149 R | 222 R | 295 P | 368 A | 441 P | 514 M | 587 E | 660 A | 733 S | 806 L | 879 K | 952 I |
| 4 W  | 77 M  | 150 R | 223 T | 296 Q | 369 Y | 442 D | 515 E | 588 Q | 661 E | 734 R | 807 T | 880 C | 953 Q |
| 5 Y  | 78 D  | 151 E | 224 L | 297 V | 370 Q | 443 K | 516 E | 589 S | 662 E | 735 H | 808 P | 881 R | 954 K |
| 6 H  | 79 A  | 152 I | 225 V | 298 L | 371 R | 444 I | 517 V | 590 L | 663 R | 736 P | 809 I | 882 T | 955 G |
| 7 E  | 80 L  | 153 C | 226 A | 299 K | 372 M | 445 S | 518 A | 591 L | 664 R | 737 C | 810 D | 883 L | 956 H |
| 8 T  | 81 I  | 154 R | 227 H | 300 G | 373 V | 446 E | 519 D | 592 E | 665 D | 738 I | 811 R | 884 F | 957 R |
| 9 L  | 82 G  | 155 I | 228 Y | 301 M | 374 L | 447 V | 520 G | 593 Y | 666 V | 739 T | 812 V | 885 S | 958 K |
| 10 E | 83 V  | 156 I | 229 P | 302 T | 375 D | 448 V | 521 F | 594 L | 667 S | 740 K | 813 F | 886 T | 959 A |
| 11 W | 84 S  | 157 T | 230 P | 303 S | 376 A | 449 E | 522 K | 595 E | 668 L | 741 T | 814 T | 887 H | 960 R |
| 12 L | 85 E  | 158 K | 231 V | 304 E | 377 V | 450 L | 523 S | 596 K | 669 K | 742 F | 815 R | 888 Y | 961 E |
| 13 K | 86 L  | 159 G | 232 Q | 305 S | 378 T | 451 L | 524 K | 597 Q | 670 D | 743 F | 816 L | 889 H | 962 F |
| 14 E | 87 G  | 160 T | 233 V | 306 D | 379 L | 452 K | 525 I | 598 R | 671 C | 744 G | 817 G | 890 S | 963 E |
| 15 E | 88 L  | 161 Q | 234 L | 307 S | 380 N | 453 K | 526 L | 599 N | 672 M | 745 D | 818 A | 891 L | 964 K |
| 16 K | 89 V  | 162 T | 235 F | 308 I | 381 N | 454 L | 527 K | 600 R | 673 R | 746 D | 819 S | 892 V | 965 M |
| 17 R | 90 F  | 163 Y | 236 E | 309 G | 382 L | 455 P | 528 Q | 601 I | 674 R | 747 F | 820 D | 893 E | 966 N |
| 18 R | 91 M  | 164 S | 237 K | 310 L | 383 E | 456 D | 529 V | 602 G | 675 L | 748 I | 821 R | 894 D | 967 Q |
| 19 D | 92 K  | 165 V | 238 G | 311 T | 384 I | 457 L | 530 I | 603 C | 676 F | 749 P | 822 I | 895 Y | 968 S |
| 20 E | 93 G  | 166 L | 239 N | 312 P | 385 F | 458 E | 531 S | 604 R | 677 Y | 750 N | 823 M | 896 S | 969 L |
| 21 H | 94 N  | 167 E | 240 L | 313 G | 386 L | 459 R | 532 L | 605 T | 678 N | 751 D | 824 S | 897 Q | 970 R |
| 22 R | 95 W  | 168 G | 241 S | 314 E | 387 N | 460 L | 533 Q | 606 I | 679 F | 752 I | 825 G | 898 N | 971 L |
| 23 R | 96 A  | 169 D | 242 K | 315 K | 388 G | 461 L | 534 T | 607 V | 680 D | 753 L | 826 E | 899 V | 972 F |
| 24 R | 97 H  | 170 P | 243 E | 316 S | 389 T | 462 S | 535 K | 608 Y | 681 K | 754 I | 827 S | 900 A | 973 R |
| 25 P | 98 S  | 171 S | 244 T | 317 E | 390 N | 463 K | 536 N | 609 W | 682 N | 755 G | 828 T | 901 V | 974 E |
| 26 D | 99 G  | 172 E | 245 K | 318 L | 391 G | 464 I | 537 P | 610 G | 683 Y | 756 C | 829 F | 902 R |       |
| 27 H | 100 F | 173 N | 246 T | 319 A | 392 S | 465 H | 538 E | 611 I | 684 K | 757 E | 830 F | 903 L |       |
| 28 P | 101 P | 174 Y | 247 I | 320 L | 393 T | 466 N | 539 G | 612 G | 685 D | 758 E | 831 V | 904 G |       |
| 29 D | 102 E | 175 S | 248 L | 321 S | 394 E | 467 V | 540 R | 613 R | 686 W | 759 E | 832 E | 905 H |       |
| 30 F | 103 I | 176 K | 249 K | 322 A | 395 G | 468 G | 541 F | 614 N | 687 Q | 760 E | 833 L | 906 M |       |
| 31 D | 104 A | 177 Y | 250 S | 323 L | 396 T | 469 S | 542 P | 615 R | 688 S | 761 Q | 834 S | 907 A |       |
| 32 A | 105 F | 178 L | 251 S | 324 G | 397 L | 470 P | 543 D | 616 Y | 689 A | 762 E | 835 E | 908 C |       |
| 33 S | 106 G | 179 L | 252 L | 325 G | 398 L | 471 L | 544 L | 617 Q | 690 V | 763 N | 836 T | 909 M |       |
| 34 T | 107 R | 180 S | 253 S | 326 C | 399 E | 472 K | 545 T | 618 L | 691 E | 764 G | 837 A | 910 V |       |
| 35 L | 108 Y | 181 L | 254 C | 327 V | 400 R | 473 S | 546 V | 619 E | 692 C | 765 K | 838 S | 911 E |       |
| 36 Y | 109 S | 182 K | 255 S | 328 F | 401 V | 474 Q | 547 E | 620 I | 693 I | 766 A | 839 I | 912 N |       |
| 37 V | 110 D | 183 E | 256 L | 329 Y | 402 D | 475 N | 548 L | 621 P | 694 A | 767 Y | 840 L | 913 E |       |
| 38 P | 111 S | 184 K | 257 Q | 330 L | 403 T | 476 H | 549 N | 622 E | 695 V | 768 C | 841 M | 914 C |       |
| 39 E | 112 L | 185 E | 258 E | 331 K | 404 C | 477 P | 550 R | 623 N | 696 L | 769 V | 842 H | 915 E |       |
| 40 D | 113 V | 186 E | 259 G | 332 K | 405 H | 478 D | 551 W | 624 F | 697 D | 770 L | 843 A | 916 D |       |
| 41 F | 114 Q | 187 D | 260 L | 333 C | 406 T | 479 S | 552 D | 625 T | 698 V | 771 V | 844 T | 917 P |       |
| 42 L | 115 K | 188 S | 261 I | 334 L | 407 P | 480 R | 553 T | 626 T | 699 L | 772 T | 845 A | 918 S |       |
| 43 N | 116 G | 189 S | 262 P | 335 I | 408 F | 481 A | 554 A | 627 R | 700 L | 773 G | 846 H | 919 Q |       |
| 44 S | 117 Y | 190 G | 263 G | 336 D | 409 G | 482 I | 555 F | 628 N | 701 C | 774 P | 847 S | 920 E |       |
| 45 C | 118 K | 191 H | 264 S | 337 Q | 410 K | 483 M | 556 D | 629 L | 702 L | 775 N | 848 L | 921 T |       |
| 46 T | 119 V | 192 T | 265 Q | 338 E | 411 R | 484 Y | 557 H | 630 P | 703 A | 776 M | 849 V | 922 I |       |
| 47 P | 120 A | 193 R | 266 F | 339 L | 412 L | 485 E | 558 E | 631 E | 704 N | 777 G | 850 L | 923 T |       |
| 48 G | 121 R | 194 A | 267 W | 340 L | 413 L | 486 E | 559 K | 632 E | 705 Y | 778 G | 851 V | 924 F |       |
| 49 M | 122 V | 195 Y | 268 D | 341 S | 414 K | 487 T | 560 A | 633 Y | 706 S | 779 K | 852 D | 925 L |       |
| 50 R | 123 E | 196 G | 269 A | 342 M | 415 Q | 488 T | 561 R | 634 E | 707 R | 780 S | 853 E | 926 Y |       |
| 51 K | 124 Q | 197 V | 270 S | 343 A | 416 W | 489 Y | 562 K | 635 L | 708 G | 781 T | 854 L | 927 K |       |
| 52 W | 125 T | 198 C | 271 K | 344 N | 417 L | 490 S | 563 T | 636 K | 709 G | 782 L | 855 G | 928 F |       |
| 53 W | 126 E | 199 F | 272 T | 345 F | 418 C | 491 K | 564 G | 637 S | 710 D | 783 M | 856 R | 929 I |       |
| 54 Q | 127 T | 200 V | 273 L | 346 E | 419 A | 492 K | 565 L | 638 T | 711 G | 784 R | 857 G | 930 K |       |
| 55 I | 128 P | 201 D | 274 R | 347 E | 420 P | 493 K | 566 I | 639 K | 712 P | 785 Q | 858 T | 931 G |       |
| 56 K | 129 E | 202 T | 275 T | 348 Y | 421 L | 494 I | 567 T | 640 K | 713 M | 786 A | 859 A | 932 A |       |
| 57 S | 130 M | 203 S | 276 L | 349 I | 422 C | 495 I | 568 P | 641 G | 714 C | 787 G | 860 T | 933 C |       |
| 58 Q | 131 M | 204 L | 277 L | 350 P | 423 N | 496 D | 569 K | 642 C | 715 R | 788 L | 861 F | 934 P |       |
| 59 N | 132 E | 205 G | 278 E | 351 L | 424 H | 497 F | 570 A | 643 K | 716 P | 789 L | 862 D | 935 K |       |
| 60 F | 133 A | 206 K | 279 E | 352 D | 425 Y | 498 L | 571 G | 644 R | 717 V | 790 A | 863 G | 936 S |       |
| 61 D | 134 R | 207 F | 280 E | 353 S | 426 A | 499 S | 572 F | 645 Y | 718 I | 791 V | 864 T | 937 Y |       |
| 62 L | 135 C | 208 F | 281 Y | 354 D | 427 I | 500 A | 573 D | 646 W | 719 L | 792 M | 865 A | 938 G |       |
| 63 V | 136 R | 209 I | 282 F | 355 T | 428 N | 501 L | 574 S | 647 T | 720 L | 793 A | 866 I | 939 F |       |
| 64 I | 137 K | 210 G | 283 R | 356 V | 429 D | 502 E | 575 D | 648 K | 721 P | 794 Q | 867 A | 940 N |       |
| 65 C | 138 M | 211 Q | 284 E | 357 S | 430 R | 503 G | 576 Y | 649 T | 722 E | 795 M | 868 N | 941 A |       |
| 66 Y | 139 A | 212 F | 285 K | 358 T | 431 L | 504 F | 577 D | 650 I | 723 D | 796 G | 869 A | 942 A |       |
| 67 K | 140 H | 213 S | 286 L | 359 T | 432 D | 505 K | 578 Q | 651 E | 724 T | 797 C | 870 V | 943 R |       |
| 68 V | 141 I | 214 D | 287 S | 360 R | 433 A | 506 V | 579 A | 652 K | 725 P | 798 Y | 871 V | 944 L |       |
| 69 G | 142 S | 215 D | 288 D | 361 S | 434 I | 507 M | 580 L | 653 K | 726 P | 799 V | 872 K | 945 A |       |
| 70 K | 143 K | 216 R | 289 G | 362 G | 435 E | 508 C | 581 A | 654 L | 727 F | 800 P | 873 E | 946 N |       |
| 71 F | 144 Y | 217 H | 290 I | 363 A | 436 D | 509 K | 582 D | 655 A | 728 L | 801 A | 874 L | 947 L |       |
| 72 Y | 145 D | 218 C | 291 G | 364 I | 437 L | 510 I | 583 I | 656 N | 729 E | 802 E | 875 A | 948 P |       |
| 73 E | 146 R | 219 S | 292 V | 365 F | 438 M | 511 I | 584 R | 657 L | 730 L | 803 V | 876 E | 949 E |       |

**Figure S8.** Residues sequence and numbering for MSH6 subunit: mismatch binding domain, 1-157; connector domain, 158-356; lever domain: 357-573 and 648-714; clamp domain, 574-647; ATPase domain, 715-974.
